# Supplementary material for: The multi-vicinal fluoroalkane motif: an examination of 2,3,4,5-tetrafluorohexane stereoisomers
Source: Royal Society of Chemistry journal article supplement (doi:10.1039/b807449f), 2008-01-01
Supplement: b807449f.pdf [file b807449f.pdf]

**The multi-vicinal fluoroalkane motif: An examination of 2,3,4,5-tetrafluorohexane stereoisomers**

Luke Hunter,<sup>\*</sup> Peer Kirsch,<sup>†</sup> John T. G. Hamilton<sup>‡</sup> and David O'Hagan<sup>\*</sup>

**SUPPORTING INFORMATION**

*\* Centre for Biomolecular Sciences and School of Chemistry  
University of St Andrews, Fife KY169ST, United Kingdom*

*† Merck Ltd. Japan, Liquid Crystal Technical Center  
4084 Nakatsu, Aikawa-machi, Aiko-gun, 243-0303 Kanagawa, Japan*

*‡ Food Chemistry Branch  
Agri-Food Biosciences Institute, Belfast BT9 5PX, United Kingdom*

**Contents:**

|                            |      |
|----------------------------|------|
| NMR analyses.....          | S-2  |
| GC-MS spectra.....         | S-28 |
| Computational details..... | S-31 |

Figure S1.  $^1\text{H}$  NMR spectrum (400 MHz, 80:20 v/v  $\text{CDCl}_3/\text{D}_8\text{-THF}$ ) of **1a**

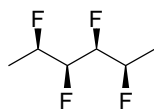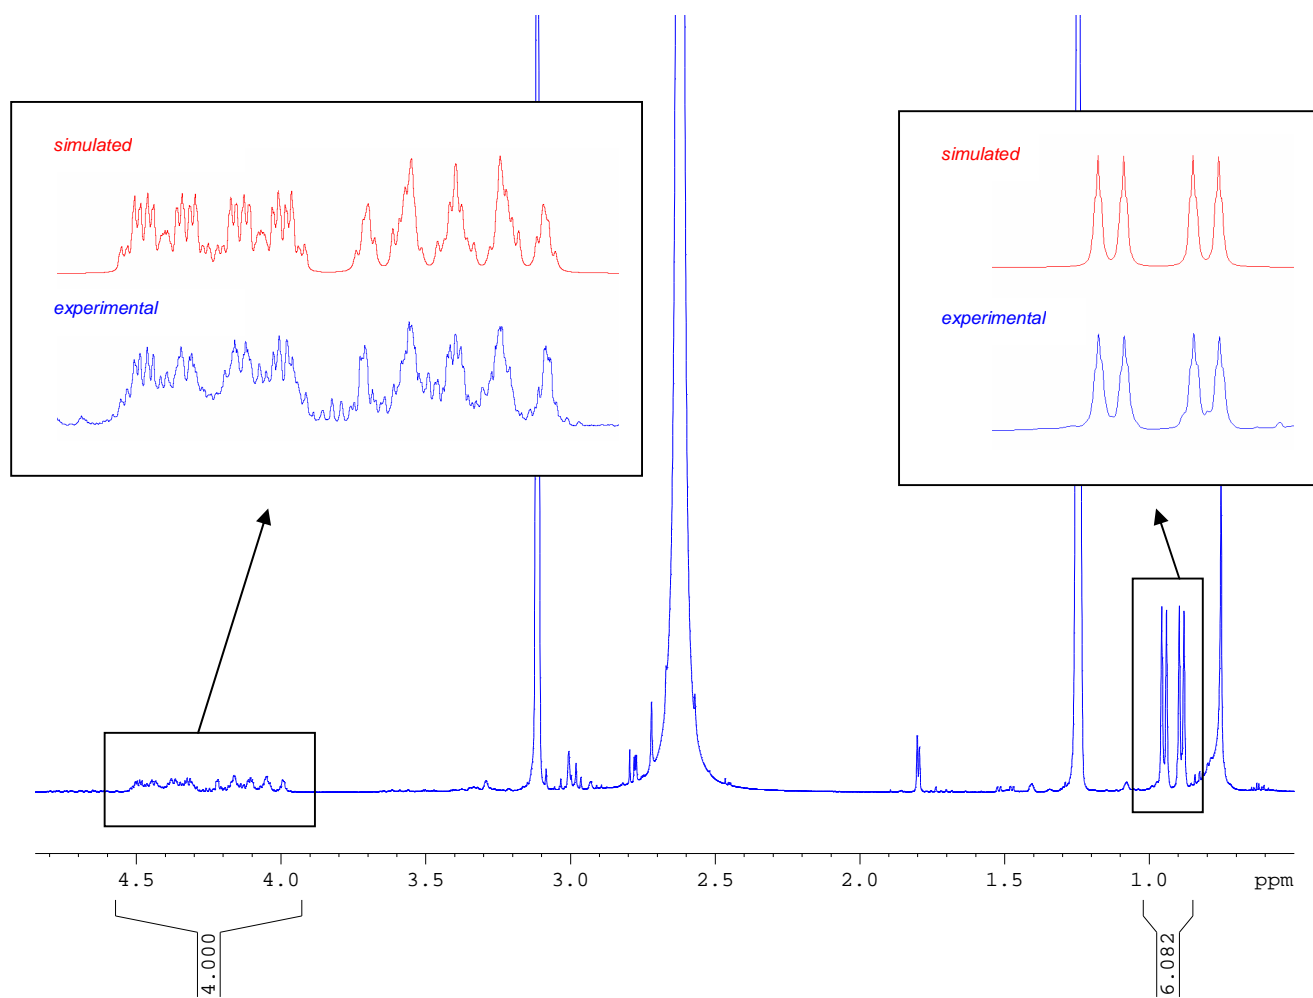

Figure S2:  $^1\text{H}$ ,  $^1\text{H}$  2D-COSY (300 MHz, 80:20 v/v  $\text{CDCl}_3/\text{D}_8\text{-THF}$ ) of **1a**

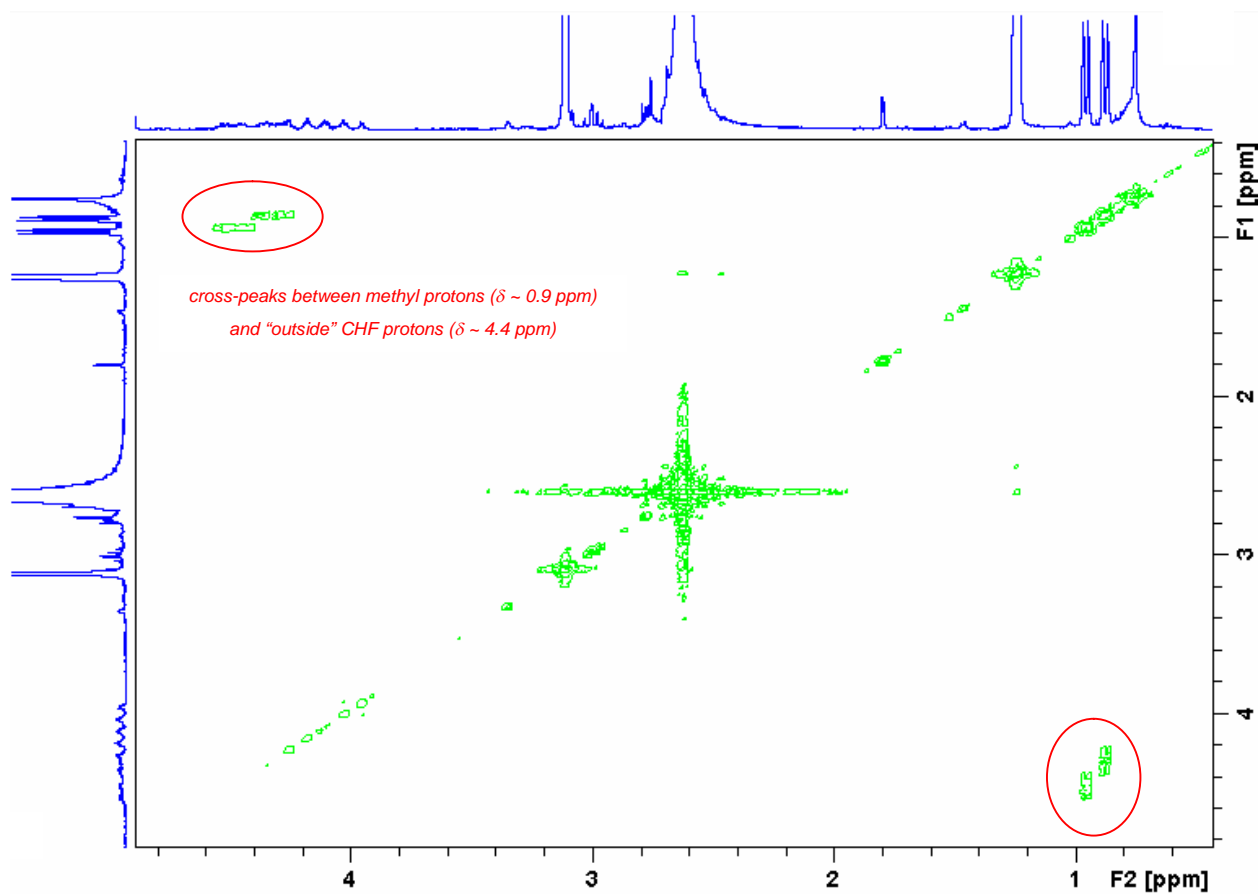

Figure S3.  $^{19}\text{F}$  NMR (376 MHz, 80:20 v/v  $\text{CDCl}_3/\text{D}_8\text{-THF}$ ) of **1a**

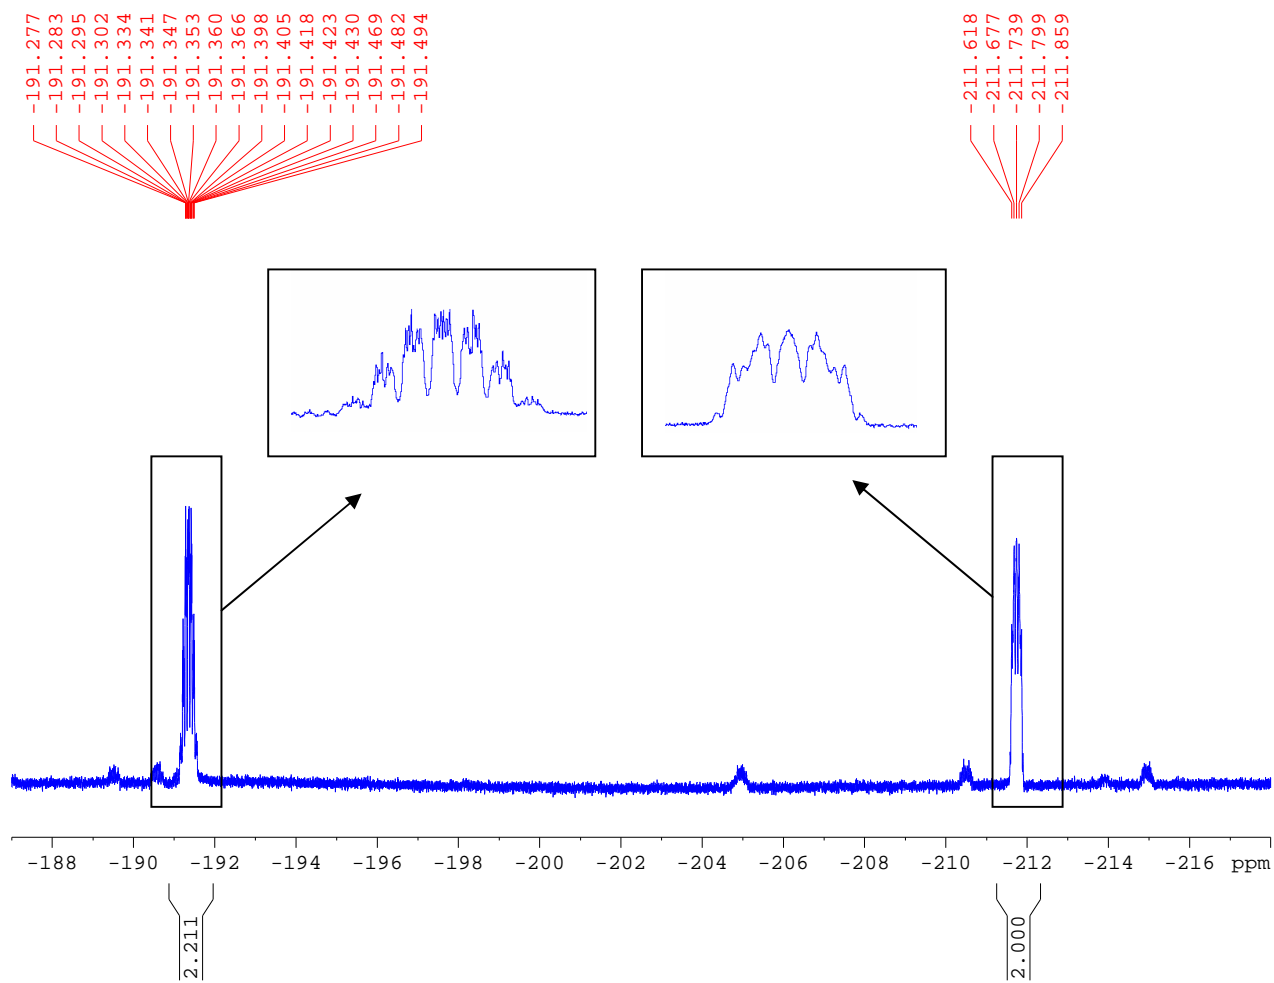

Figure S4.  $^{19}\text{F}$   $\{^1\text{H dec}\}$  NMR (376 MHz, 80:20 v/v  $\text{CDCl}_3/\text{D}_8\text{-THF}$ ) of **1a**

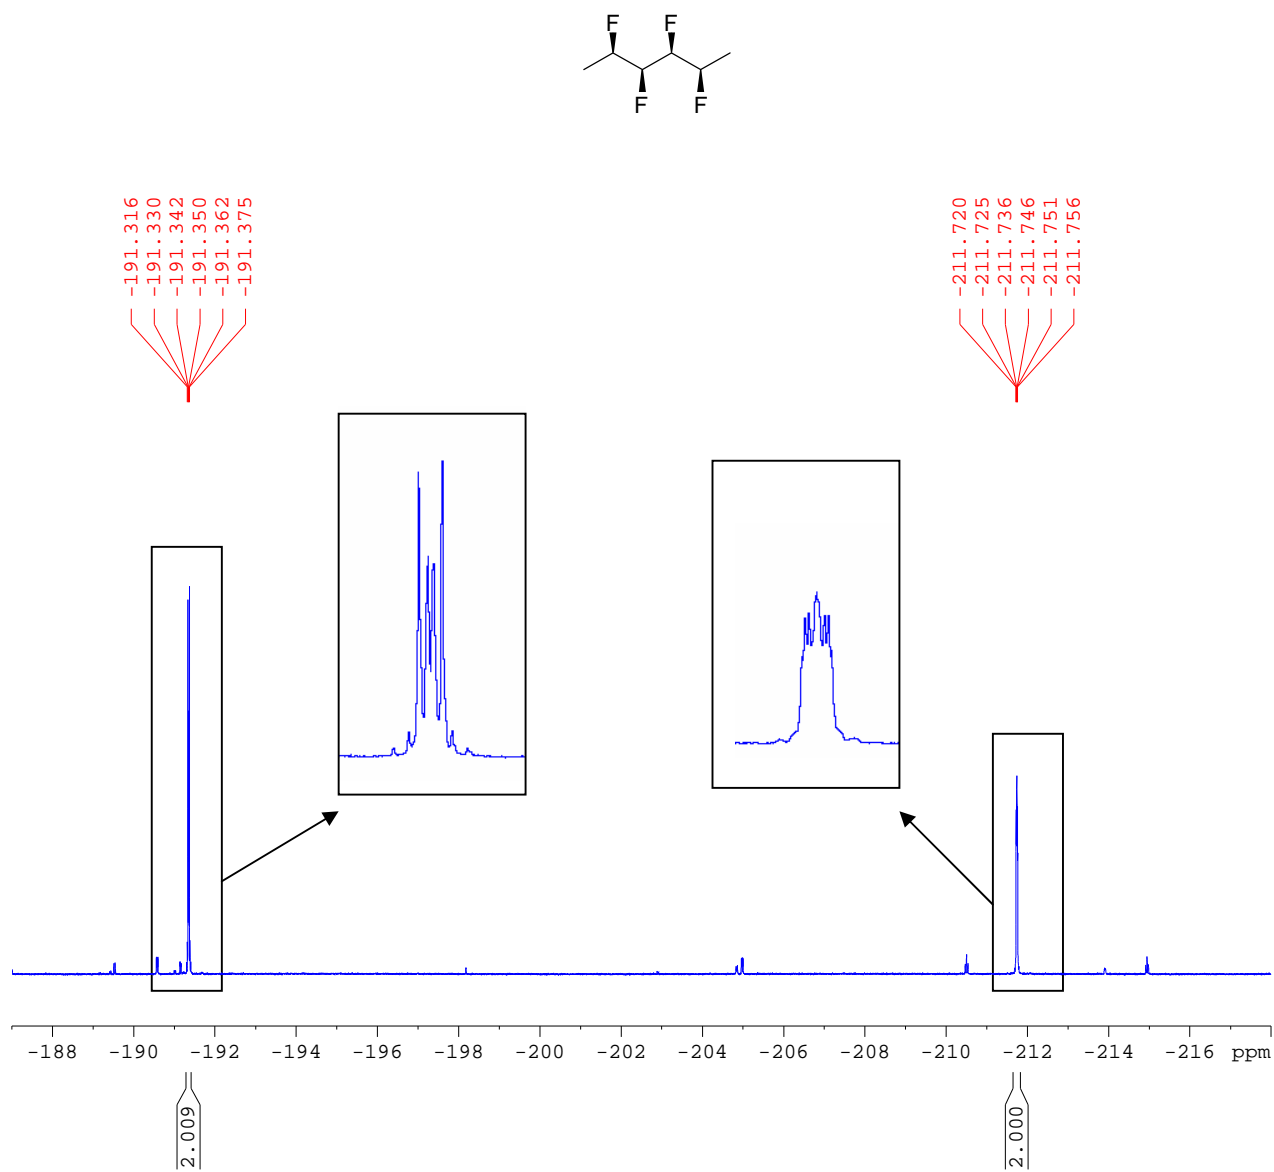

Figure S5. 2D  $^1\text{H}$ ,  $^{13}\text{C}$  HSQC with adiabatic pulses (500 MHz, 80:20 v/v  $\text{CDCl}_3/\text{D}_8\text{-THF}$ ) of **1a**

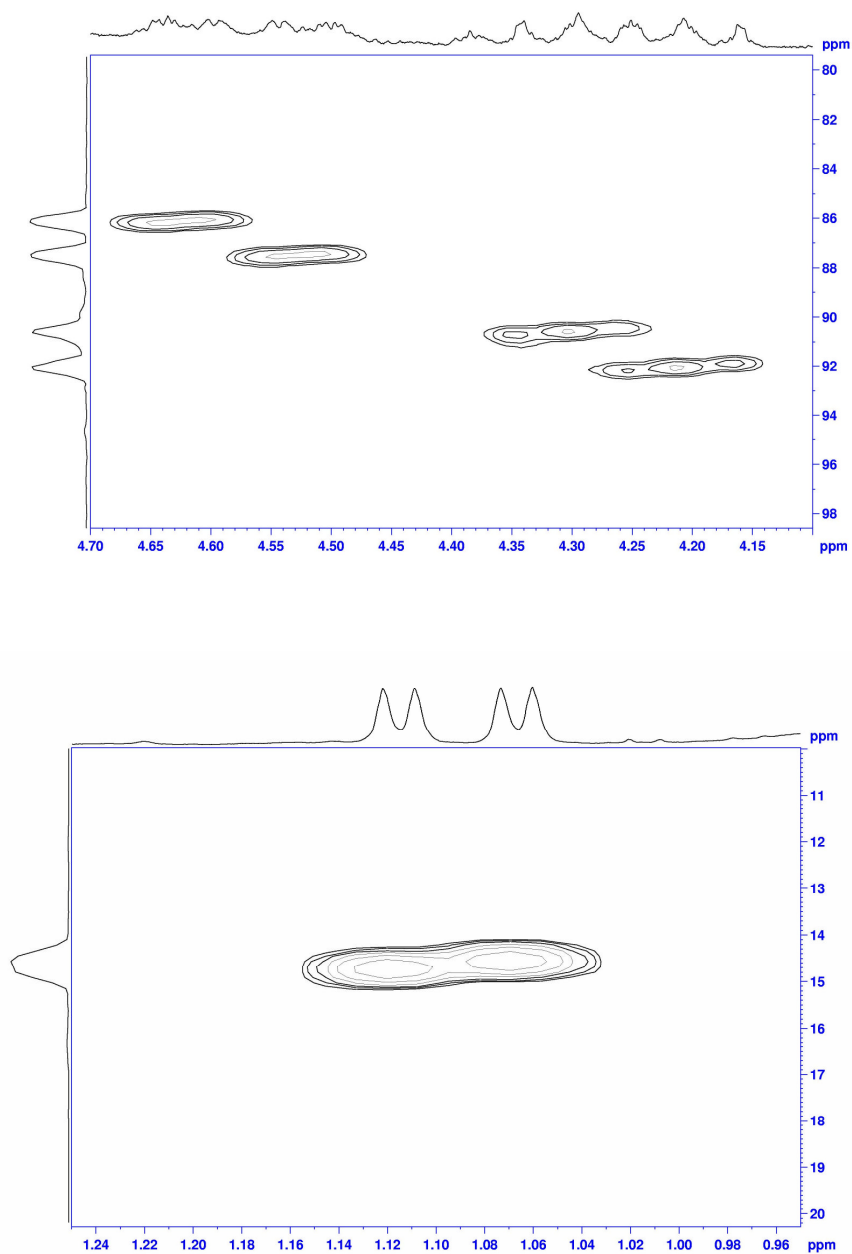

Table S1.<sup>[a]</sup> Calculated coupling constants for **1a**

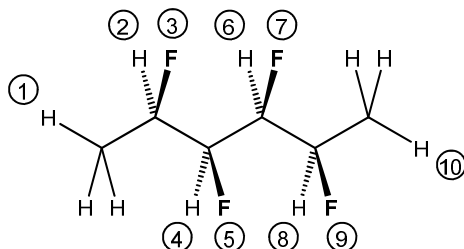

|          | <b>2</b> | <b>3</b> | <b>4</b> | <b>5</b> | <b>6</b> | <b>7</b> | <b>8</b> | <b>9</b> | <b>10</b> |
|----------|----------|----------|----------|----------|----------|----------|----------|----------|-----------|
| <b>1</b> | 6.5      | 24.1     | 0.0      | 0.9      | 0.0      | 0.9      | 0.0      | 0.0      | 0.0       |
| <b>2</b> |          | 47.7     | 3.2      | 21.5     | 0.0      | 1.0      | 0.0      | 0.0      | 0.0       |
| <b>3</b> |          |          | 22.4     | N/D      | 0.0      | N/D      | 0.0      | N/D      | 0.0       |
| <b>4</b> |          |          |          | 48.2     | 6.19     | 18.1     | 0.0      | 0.0      | 0.0       |
| <b>5</b> |          |          |          |          | 18.1     | N/D      | 1.0      | N/D      | 0.9       |
| <b>6</b> |          |          |          |          |          | 48.2     | 3.2      | 22.4     | 0.0       |
| <b>7</b> |          |          |          |          |          |          | 21.5     | N/D      | 0.9       |
| <b>8</b> |          |          |          |          |          |          |          | 47.7     | 6.5       |
| <b>9</b> |          |          |          |          |          |          |          |          | 24.1      |

<sup>[a]</sup> The  $^3J_{\text{HH}}$  and  $^3J_{\text{HF}}$  values were obtained from the simulated  $^1\text{H}$  NMR spectrum (Figure S1). The  $^3J_{\text{FF}}$  values were not determined (N/D) because the  $^{19}\text{F}$  NMR and  $^{19}\text{F}\{^1\text{H dec}\}$  NMR spectra (Figures S3 and S4) were not amenable to simulation due to poor peak shape and resolution.

Figure S6. Variable-temperature  $^1\text{H}$  NMR (500 MHz, 80:20 v/v  $\text{CDCl}_3/\text{D}_8\text{-THF}$ ) of **1a**

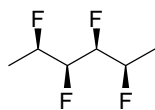

293 K

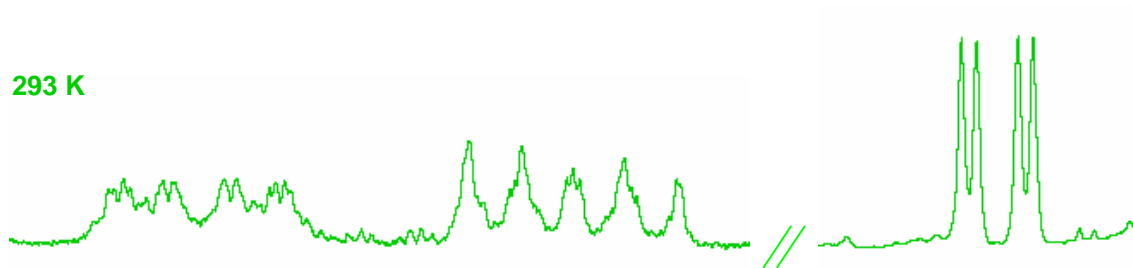

273 K

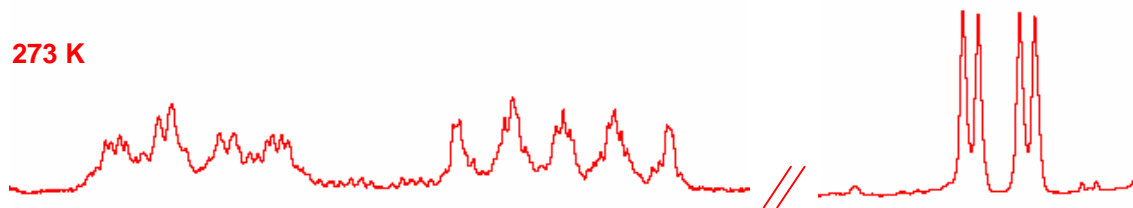

253 K

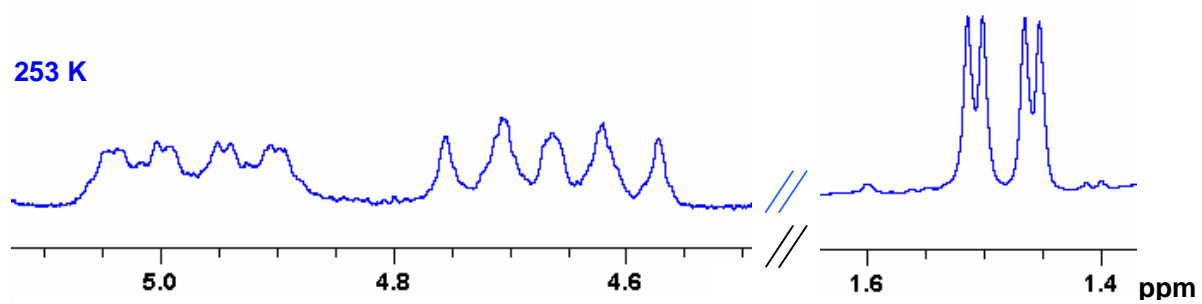



Figure S7. Variable-temperature  $^{19}\text{F}$  NMR (470 MHz, 80:20 v/v  $\text{CDCl}_3/\text{D}_8\text{-THF}$ ) of **1a**

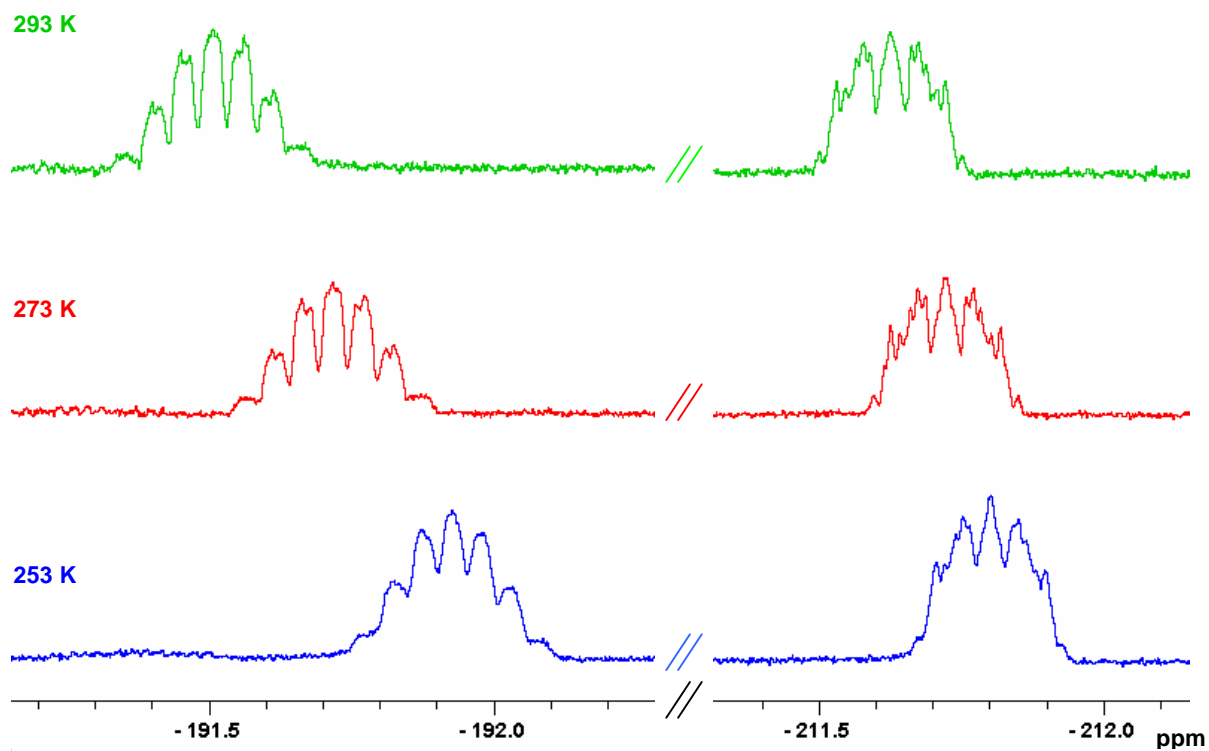

Figure S8. Variable-temperature  $^{19}\text{F}$   $\{^1\text{H dec}\}$  NMR (470 MHz, 80:20 v/v  $\text{CDCl}_3/\text{D}_8\text{-THF}$ ) of **1a**

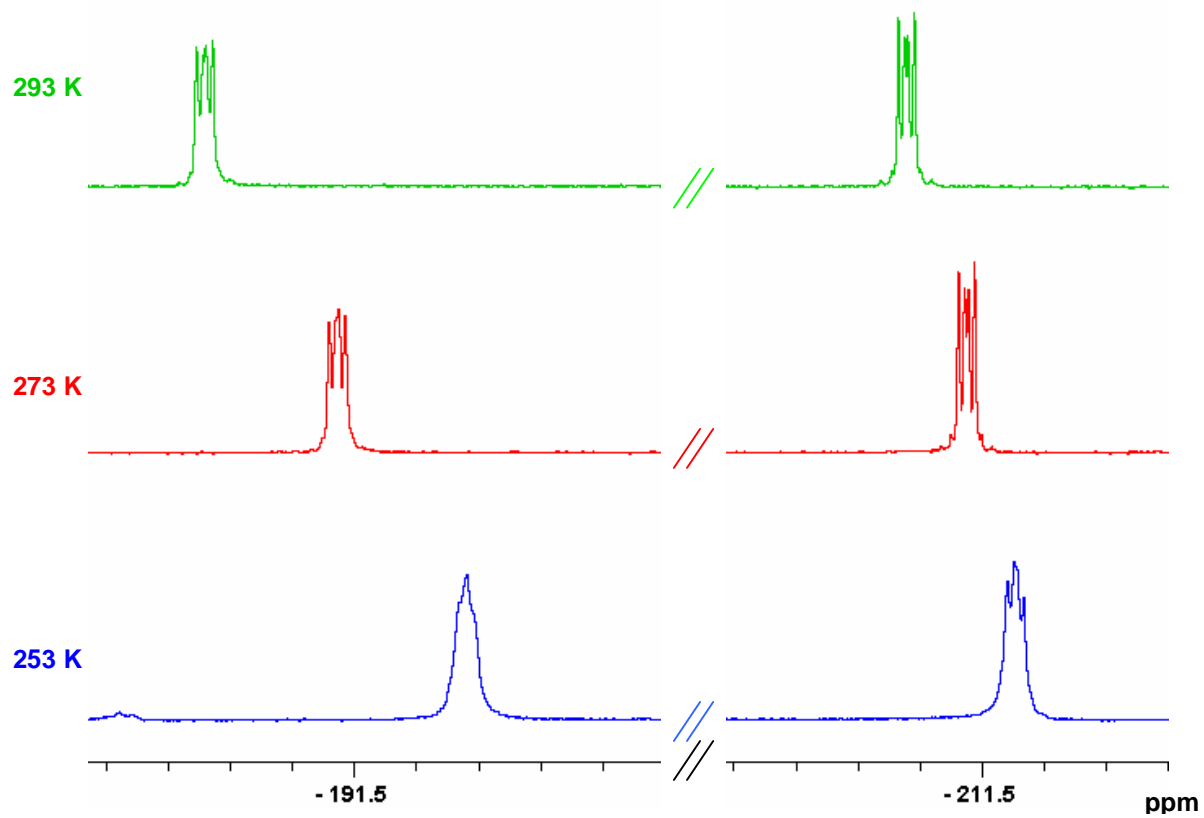

Figure S9. <sup>[a]</sup> <sup>1</sup>H NMR (400 MHz, 76:24 v/v CDCl<sub>3</sub>/THF) of **1b**

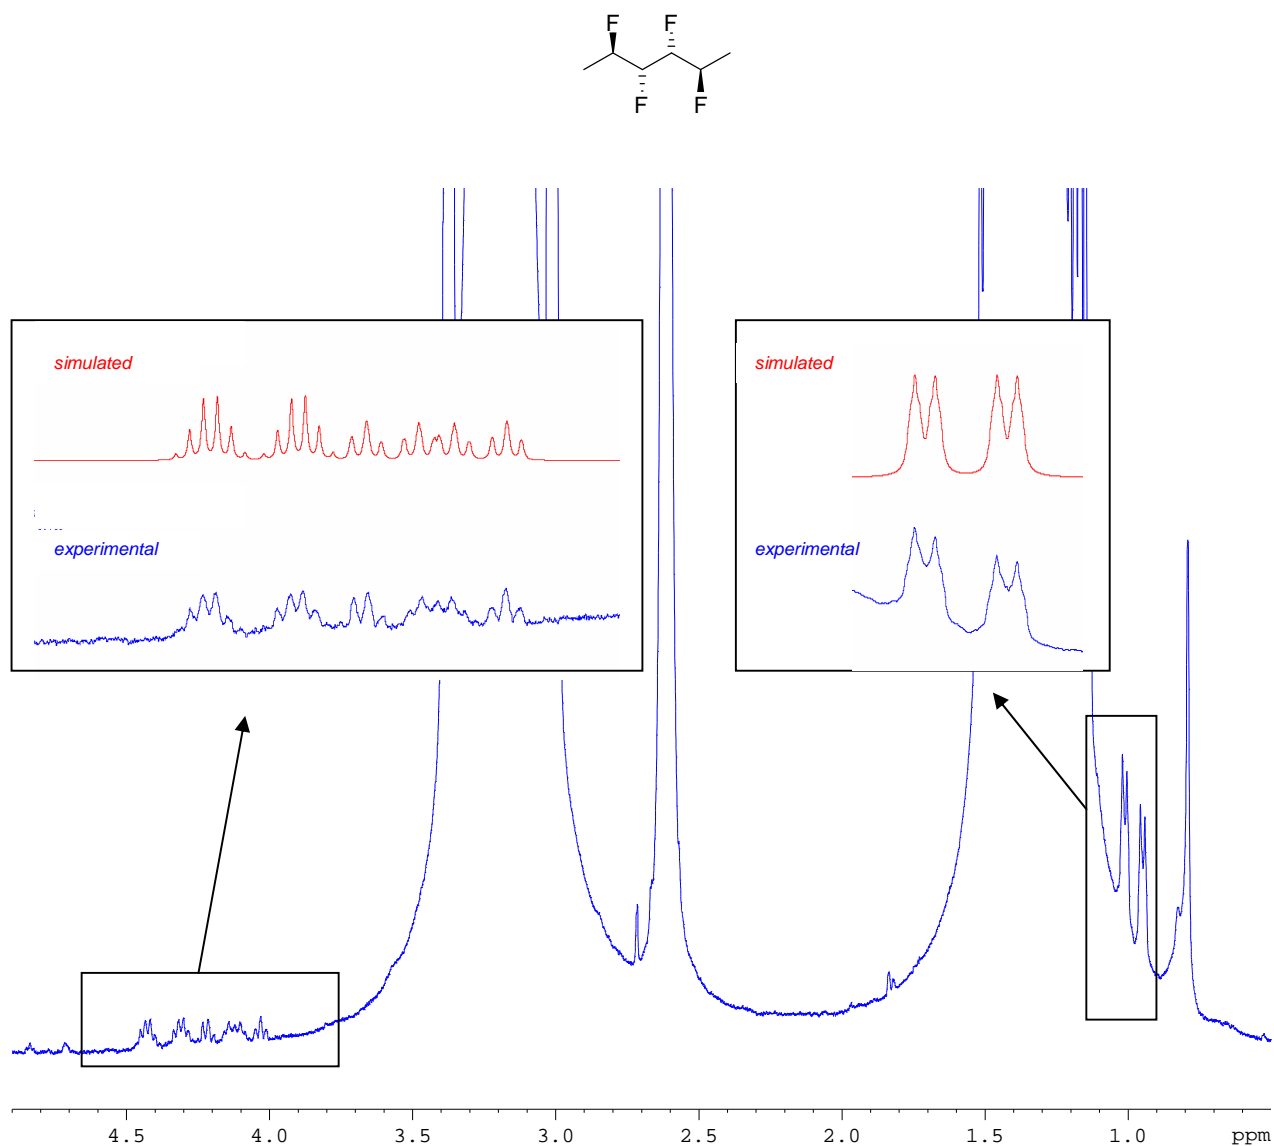

<sup>[a]</sup> This spectrum was obtained after performing the reaction in tetrahydrofuran rather than D<sub>8</sub>-tetrahydrofuran, hence the large solvent peaks. A subsequent repetition of the reaction using D<sub>8</sub>-tetrahydrofuran as the solvent provided the <sup>19</sup>F NMR spectra below (Figures S10 and S11), but the <sup>1</sup>H NMR spectrum from the reaction in D<sub>8</sub>-tetrahydrofuran contained a masking impurity in the fluoroalkyl region.

Figure S10.  $^{19}\text{F}$  NMR (376 MHz, 76:24 v/v  $\text{CDCl}_3/\text{D}_8\text{-THF}$ ) of **1b**

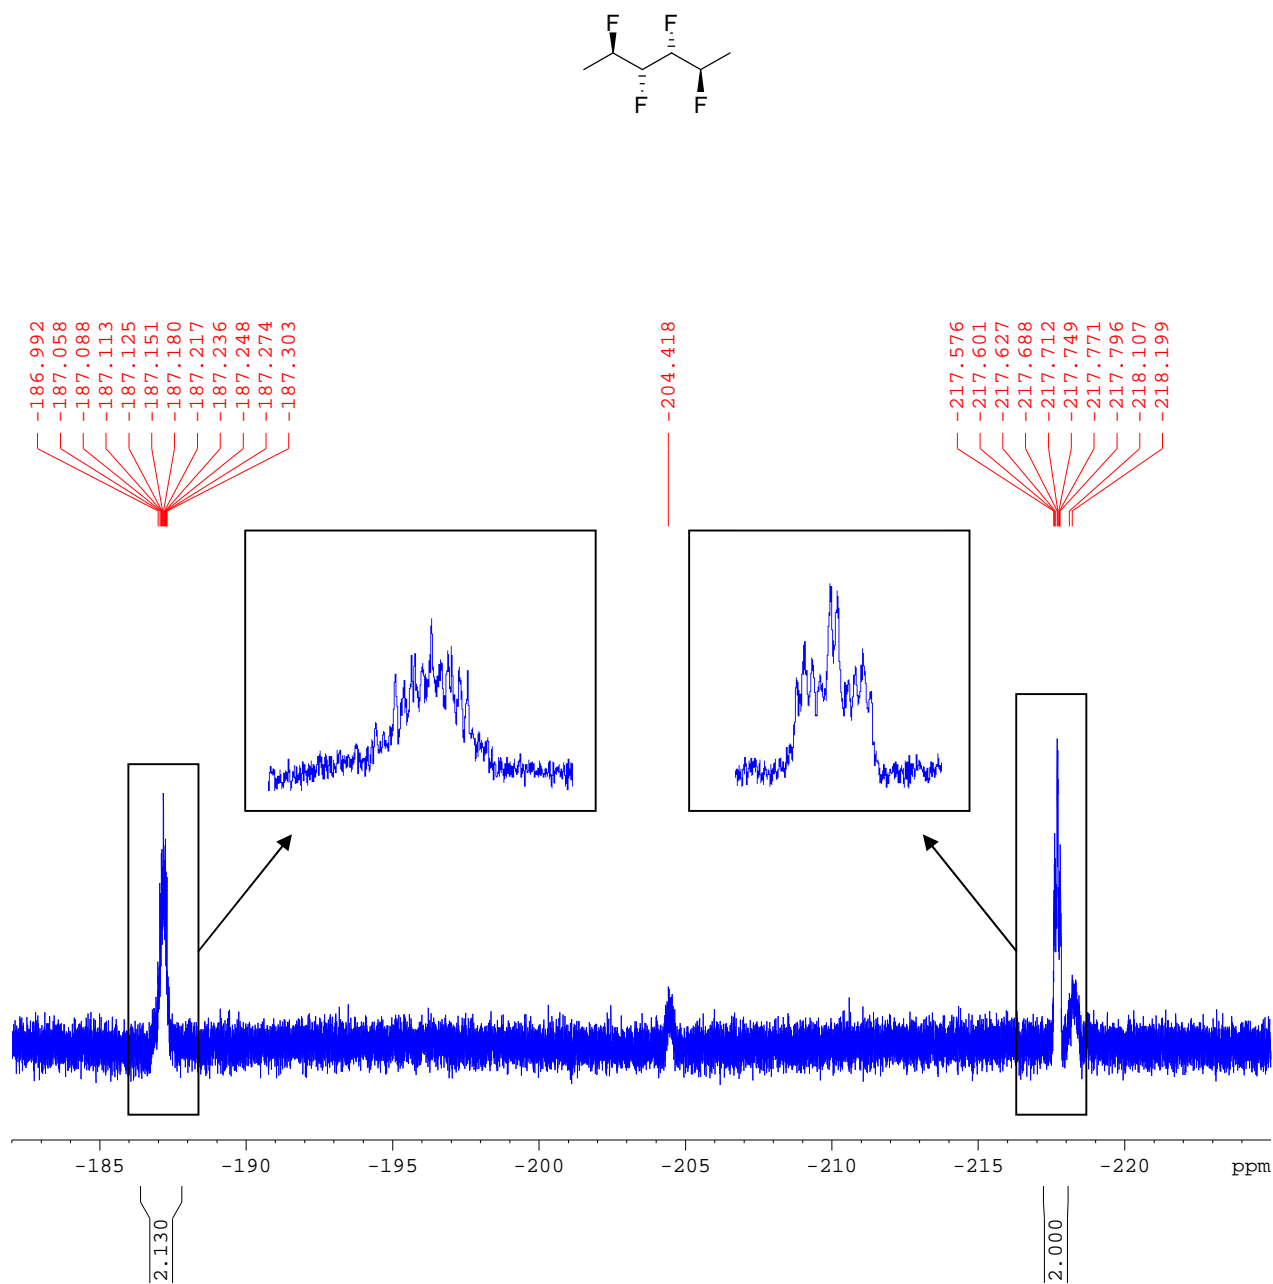

Figure S11.  $^{19}\text{F}$   $\{^1\text{H dec}\}$  NMR (376 MHz, 76:24 v/v  $\text{CDCl}_3/\text{D}_8\text{-THF}$ ) OF **1b**

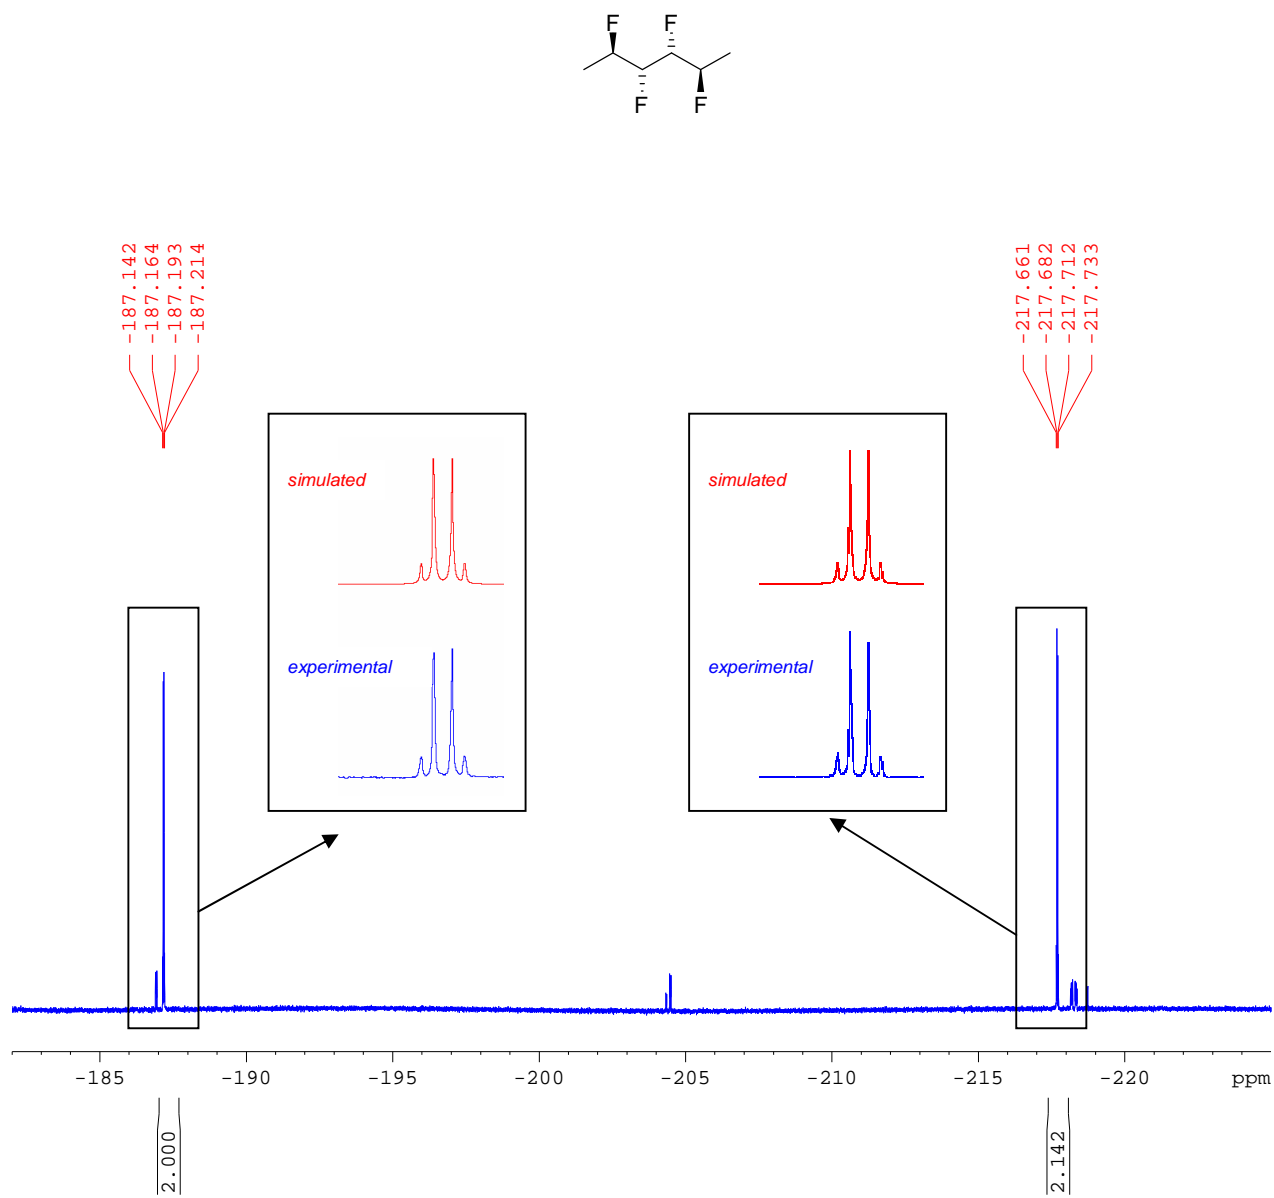

Figure S12. 2D  $^1\text{H}$ ,  $^{13}\text{C}$  HSQC with adiabatic pulses (500 MHz, 76:24 v/v  $\text{CDCl}_3/\text{D}_8\text{-THF}$ ) of **1b**

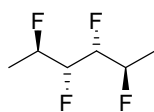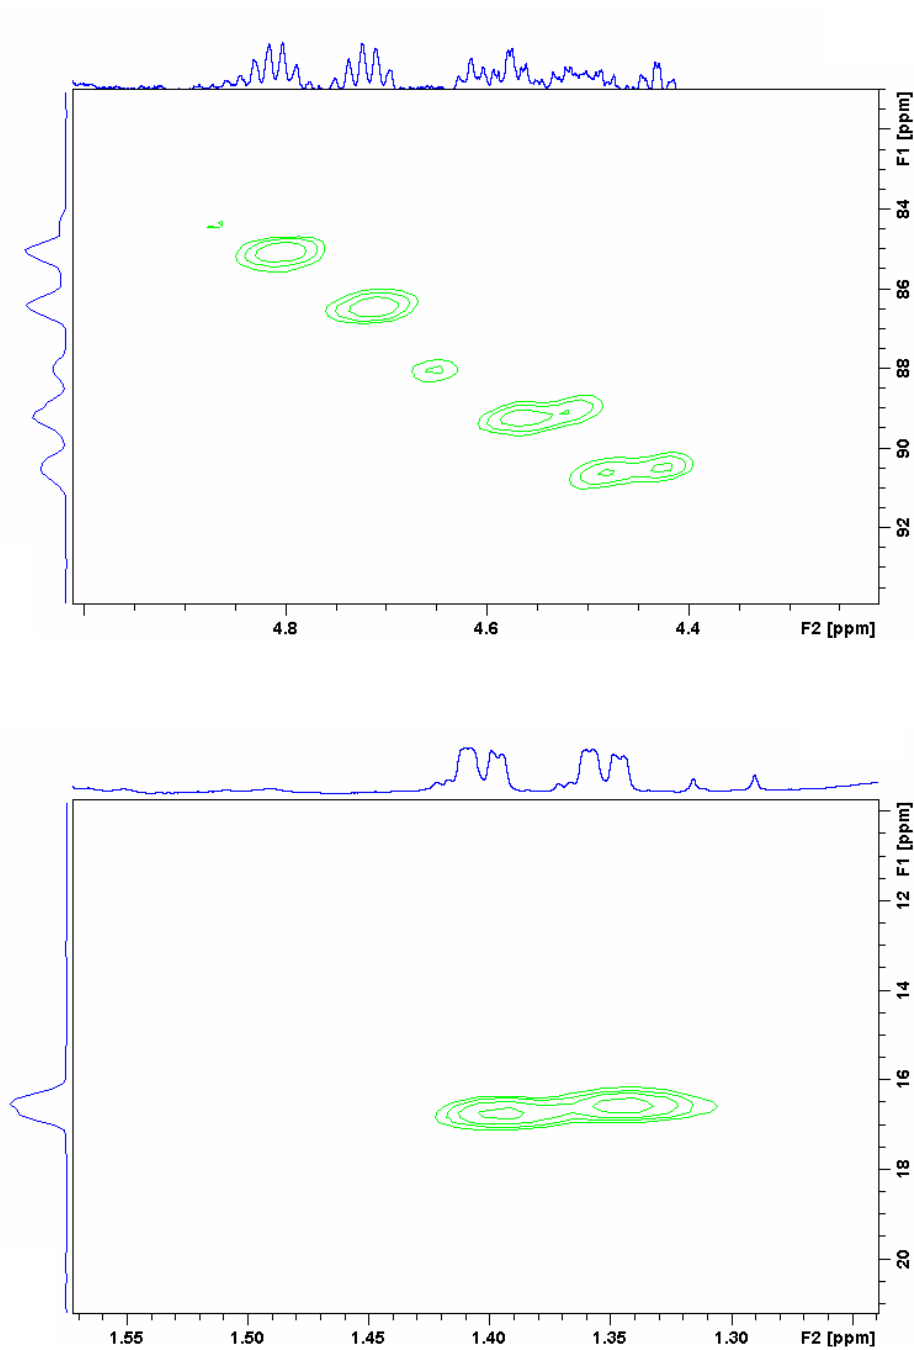

Table S2.<sup>[a]</sup> Calculated coupling constants for **1b**

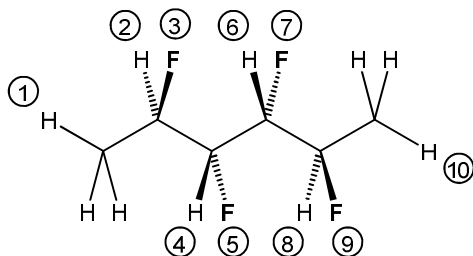

|          | <b>2</b> | <b>3</b> | <b>4</b> | <b>5</b> | <b>6</b> | <b>7</b> | <b>8</b> | <b>9</b> | <b>10</b> |
|----------|----------|----------|----------|----------|----------|----------|----------|----------|-----------|
| <b>1</b> | 6.2      | 25.2     | 0.0      | 1.5      | 0.0      | 1.5      | 0.0      | 0.0      | 0.0       |
| <b>2</b> |          | 47.0     | 7.2      | 7.2      | 0.0      | 0.0      | 0.0      | 0.0      | 0.0       |
| <b>3</b> |          |          | 8.5      | 14.4     | 0.0      | 2.7      | 0.0      | 0.4      | 0.0       |
| <b>4</b> |          |          |          | 47.0     | 1.3      | 28.0     | 0.0      | 0.0      | 0.0       |
| <b>5</b> |          |          |          |          | 28.0     | 8.2      | 0.0      | 2.7      | 1.5       |
| <b>6</b> |          |          |          |          |          | 47.0     | 7.2      | 8.5      | 0.0       |
| <b>7</b> |          |          |          |          |          |          | 7.2      | 14.4     | 1.5       |
| <b>8</b> |          |          |          |          |          |          |          | 47.0     | 6.2       |
| <b>9</b> |          |          |          |          |          |          |          |          | 25.2      |

<sup>[a]</sup> The  $^3J_{\text{HH}}$  and  $^3J_{\text{HF}}$  values were obtained from the simulated  $^1\text{H}$  NMR spectrum (Figure S9). The  $^3J_{\text{FF}}$  values were obtained from the simulated  $^{19}\text{F}$  { $^1\text{H}$  dec} NMR spectrum (Figure S11).

Figure S13. Variable-temperature  $^1\text{H}$  NMR (500 MHz, 76:24 v/v  $\text{CDCl}_3/\text{D}_8\text{-THF}$ ) of **1b**

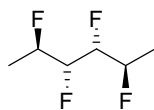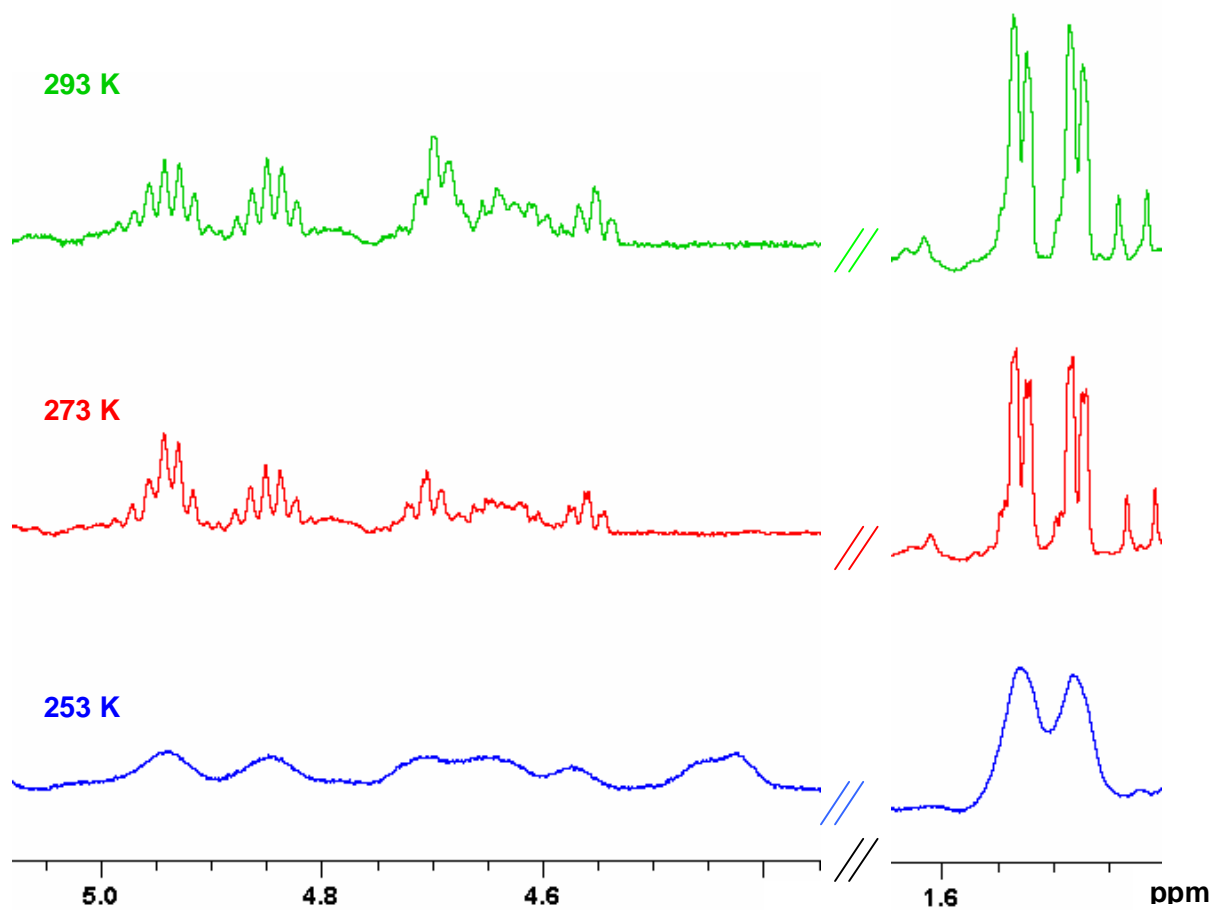



Figure S14. Variable-temperature  $^{19}\text{F}$  NMR (470 MHz, 76:24 v/v  $\text{CDCl}_3/\text{D}_8\text{-THF}$ ) of **1b**

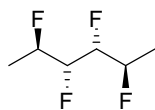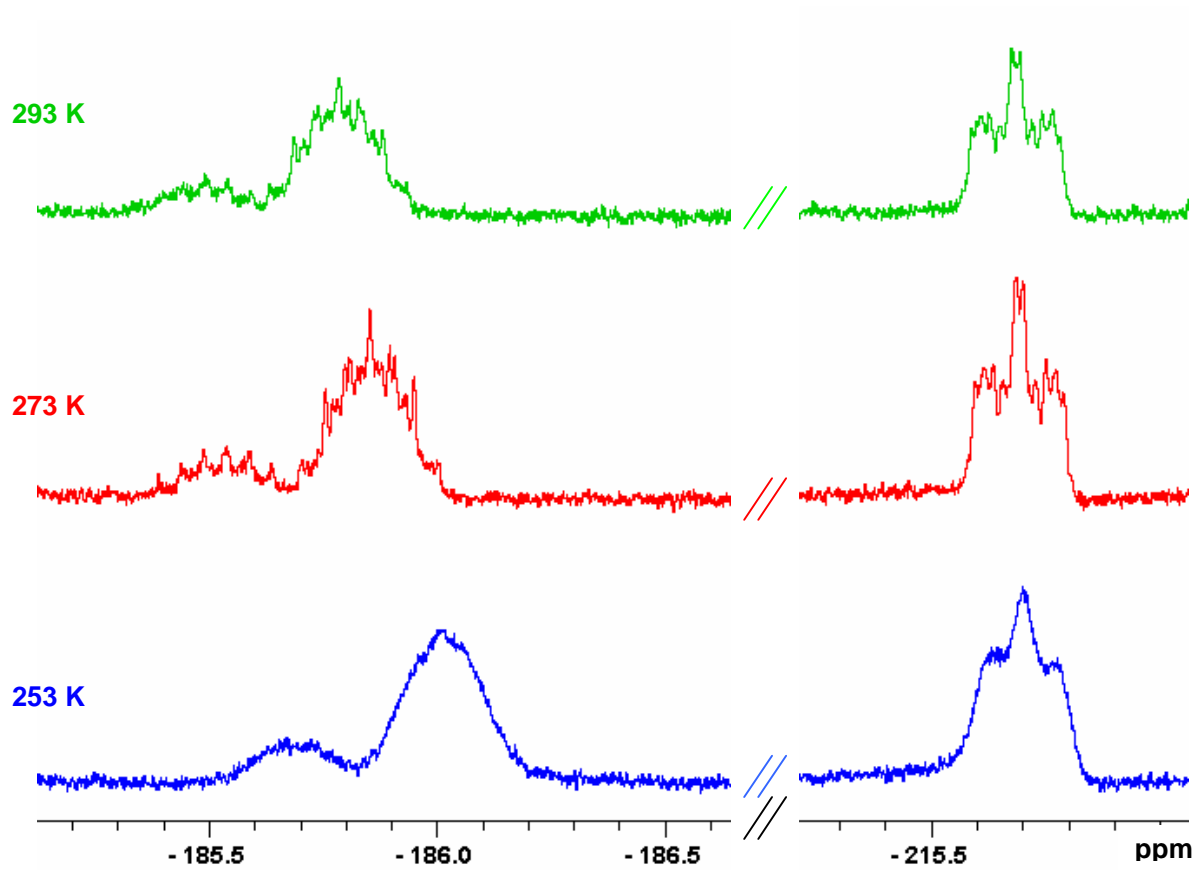

Figure S15. Variable-temperature  $^{19}\text{F}$   $\{^1\text{H dec}\}$  NMR (470 MHz, 76:24 v/v  $\text{CDCl}_3/\text{D}_8\text{-THF}$ ) of **1b**

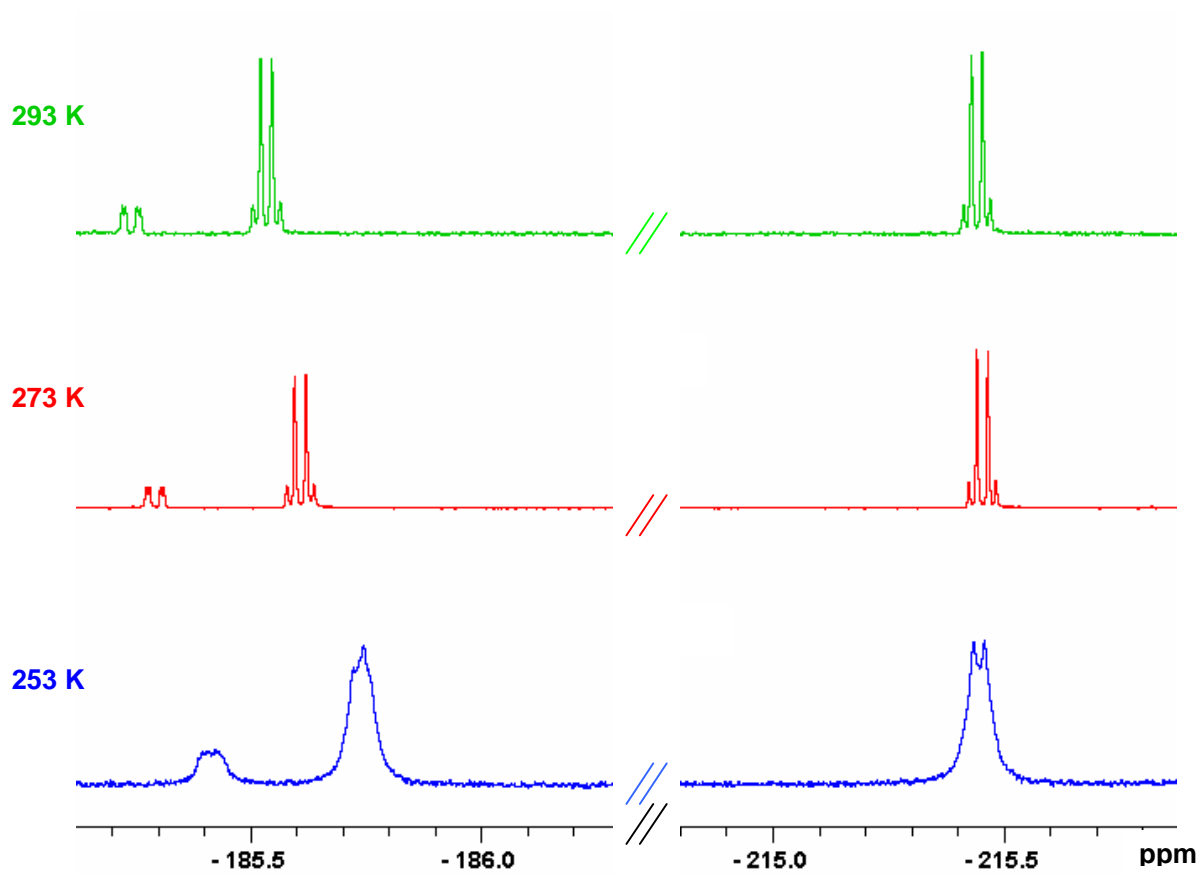

Figure S16.  $^1\text{H}$  NMR (400 MHz, 81:19 v/v  $\text{CDCl}_3/\text{D}_8\text{-THF}$ ) of **1c**

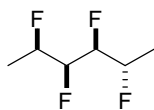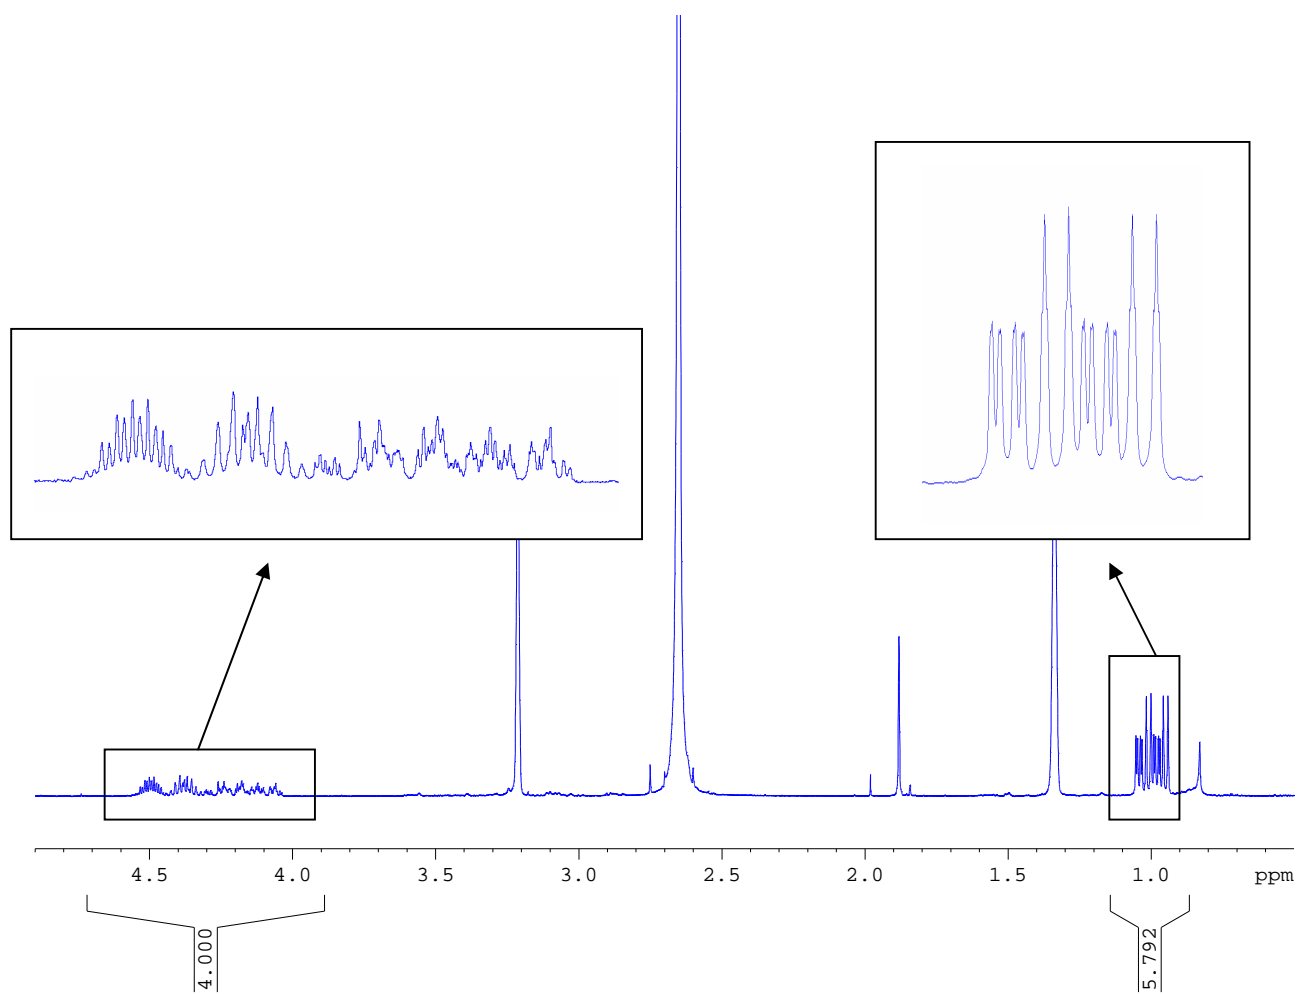

Figure S17.  $^1\text{H}$ ,  $^1\text{H}$  2D-COSY NMR (400 MHz, 81:19 v/v  $\text{CDCl}_3/\text{D}_8\text{-THF}$ ) of **1c**

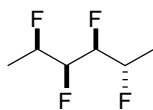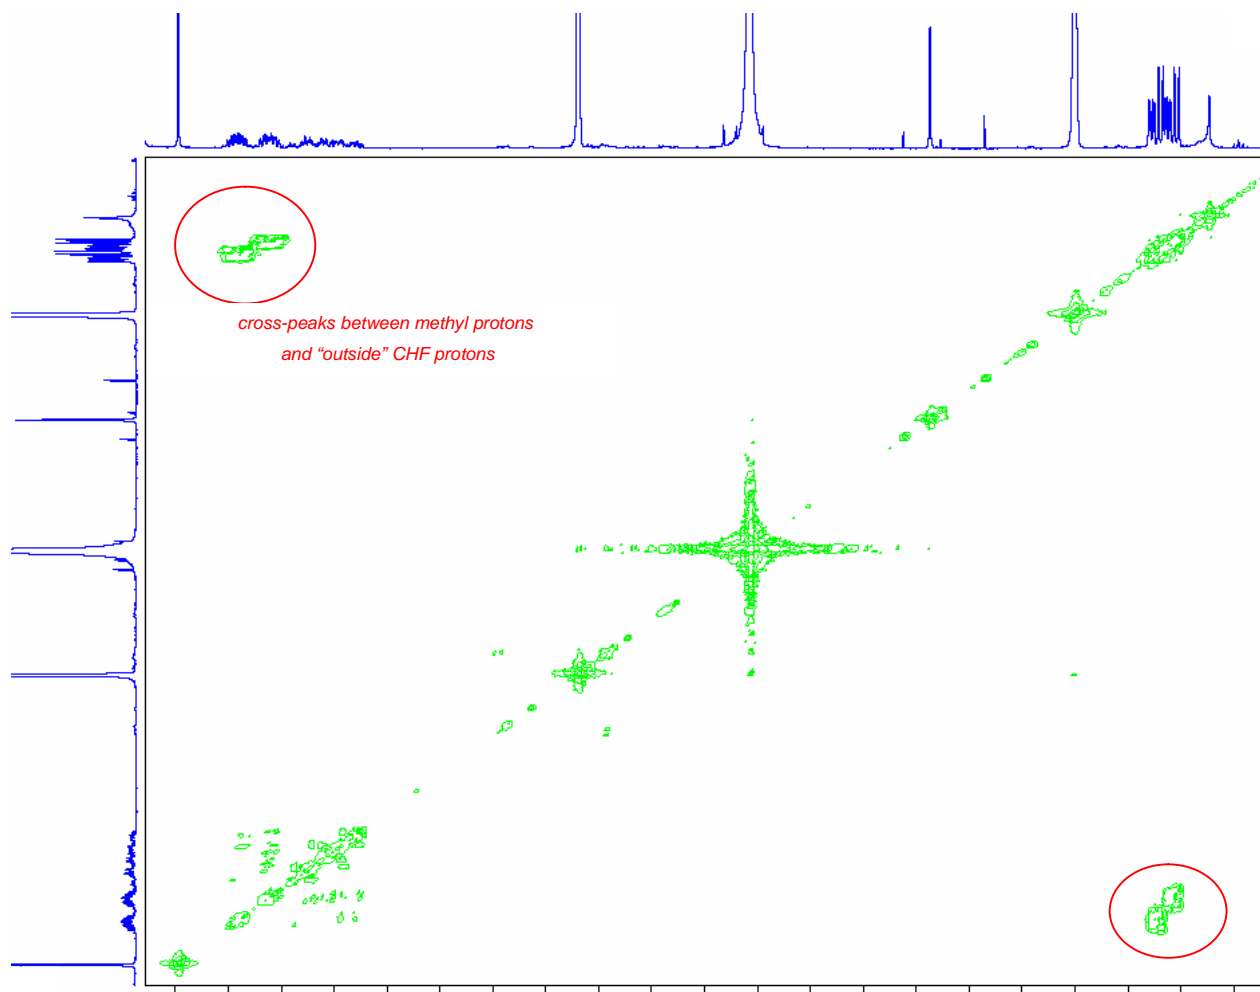

Figure S18.  $^{19}\text{F}$  NMR (376 MHz, 81:19 v/v  $\text{CDCl}_3/\text{D}_8\text{-THF}$ ) of **1c**

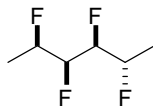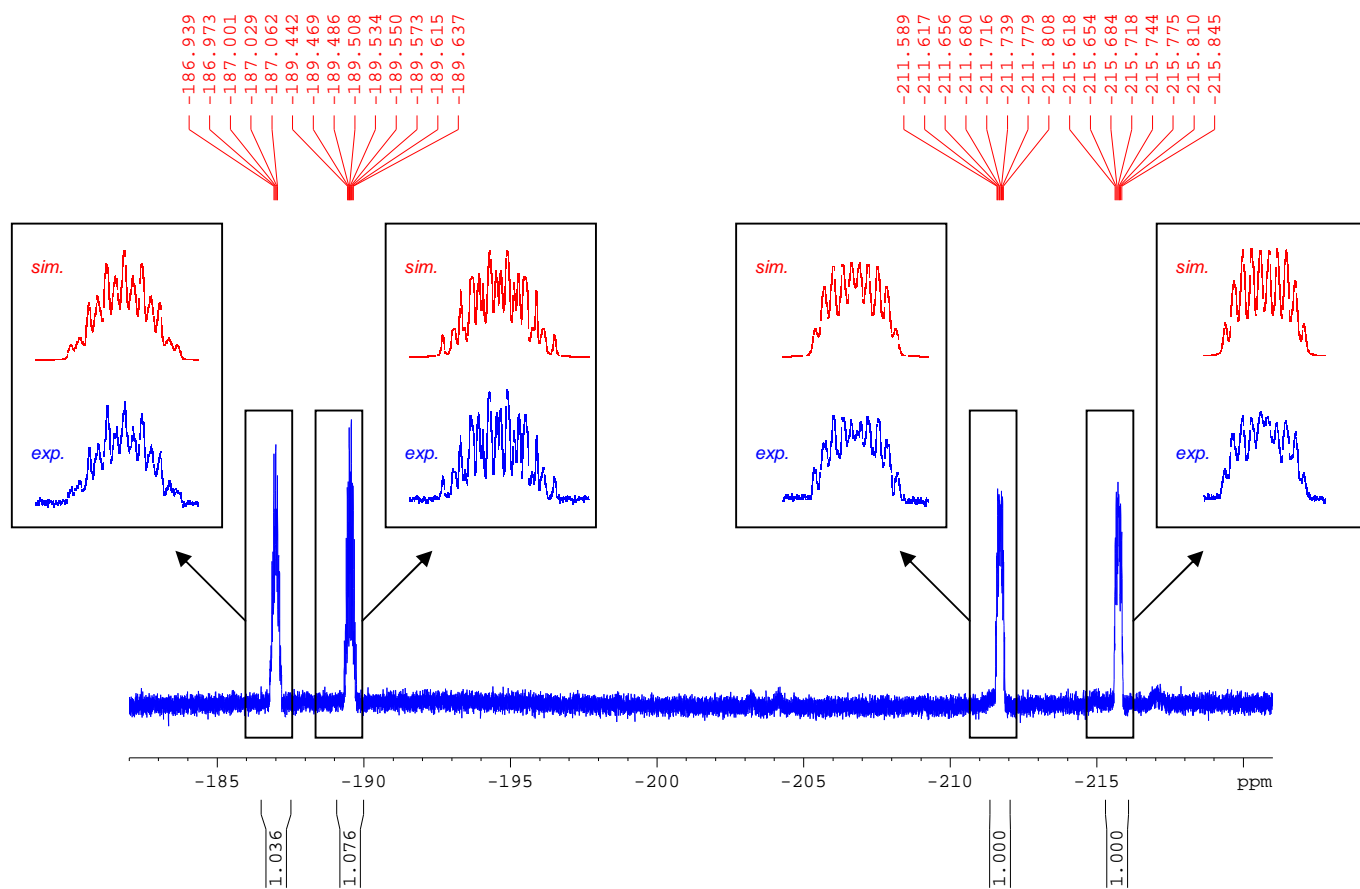

Figure S19.<sup>[a]</sup>  $^{19}\text{F}$  { $^1\text{H}$  dec} NMR (376 MHz, 81:19 v/v  $\text{CDCl}_3/\text{D}_8\text{-THF}$ ) of **1c**

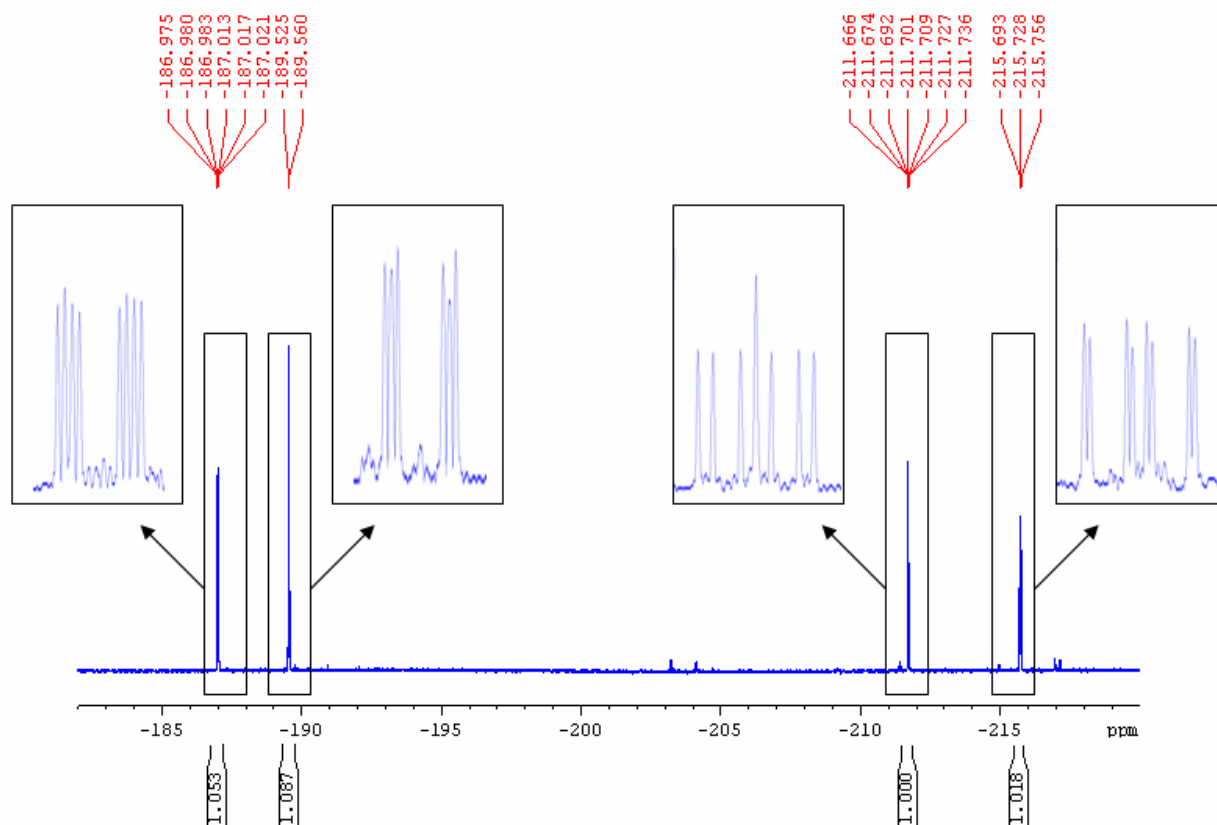

<sup>[a]</sup> The expansions are projections from the  $^{19}\text{F}$  homonuclear  $J$ -resolved spectrum with  $^1\text{H}$  decoupling.

Figure S20. 2D  $^1\text{H}$ ,  $^{13}\text{C}$  HSQC with adiabatic pulses (500 MHz, 81:19 v/v  $\text{CDCl}_3/\text{D}_8\text{-THF}$ ) of **1c**

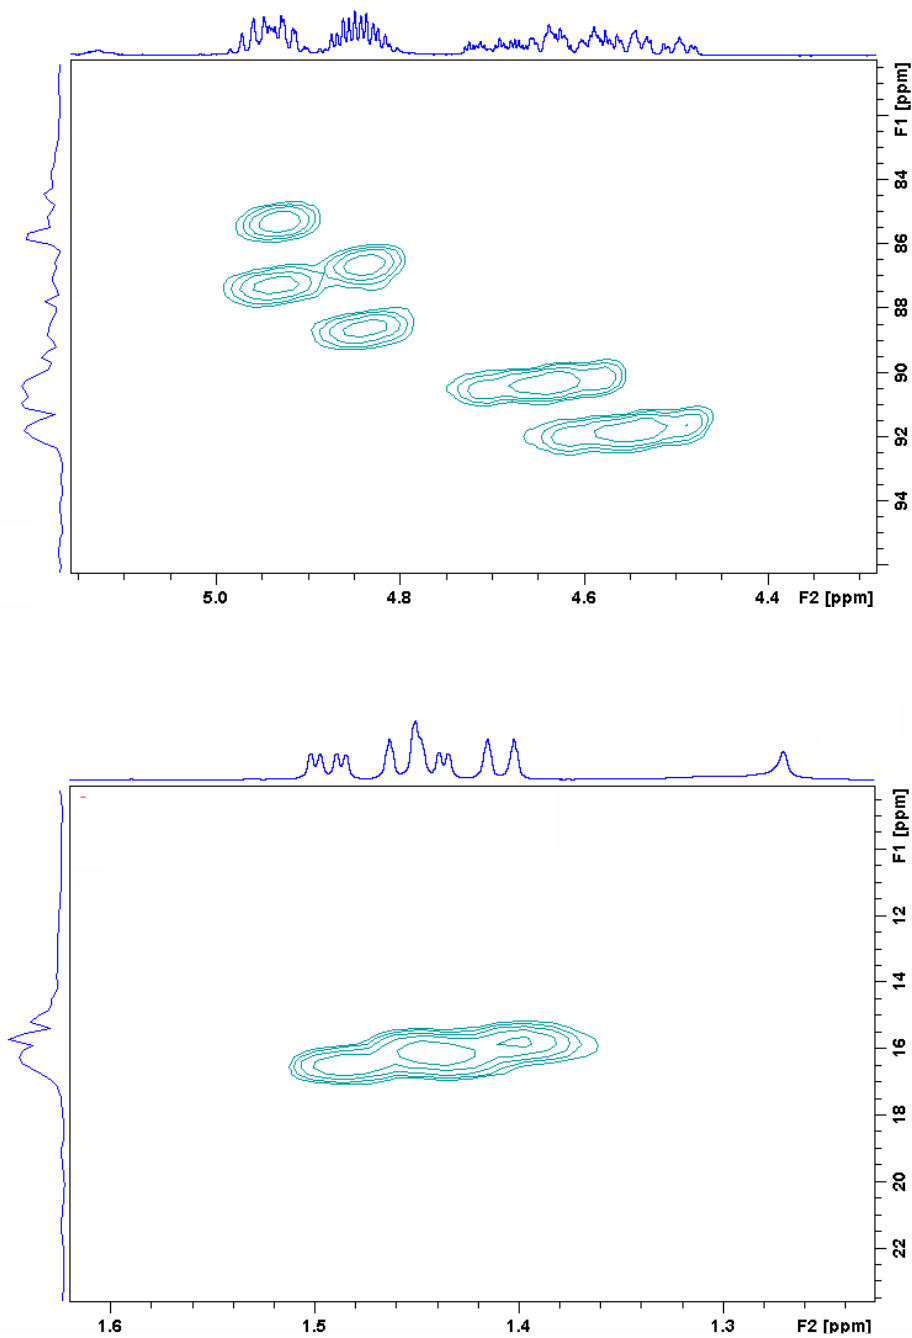

Table S3.<sup>[a]</sup> Calculated coupling constants for **1c**

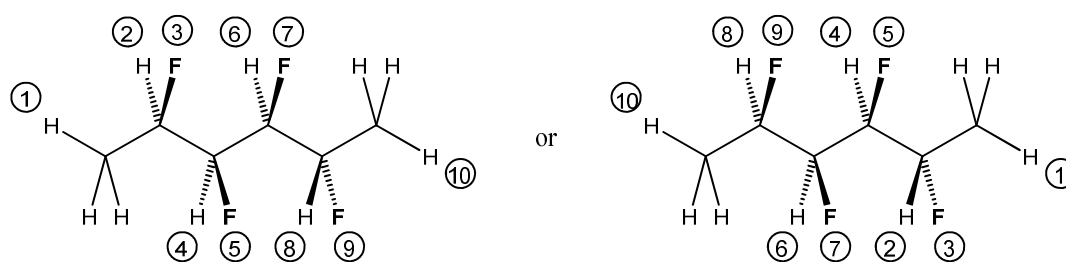

|          | <b>2</b> | <b>3</b> | <b>4</b> | <b>5</b> | <b>6</b> | <b>7</b> | <b>8</b> | <b>9</b> | <b>10</b> |
|----------|----------|----------|----------|----------|----------|----------|----------|----------|-----------|
| <b>1</b> | 6.5      | 24.5     | 0.0      | 2.0      | 0.0      | 0.5      | 0.0      | 0.0      | 0.0       |
| <b>2</b> |          | 47.0     | 6.4      | 12.0     | 0.0      | 0.0      | 0.0      | 0.0      | 0.0       |
| <b>3</b> |          |          | 9.1      | 14.2     | 2.0      | 3.4      | 0.0      | 1.6      | 0.0       |
| <b>4</b> |          |          |          | 47.0     | 2.5      | 26.0     | 0.0      | 0.6      | 0.0       |
| <b>5</b> |          |          |          |          | 24.0     | 9.8      | 0.0      | 1.4      | 0.5       |
| <b>6</b> |          |          |          |          |          | 47.0     | 6.0      | 16.7     | 0.0       |
| <b>7</b> |          |          |          |          |          |          | 13.0     | 13.2     | 2.0       |
| <b>8</b> |          |          |          |          |          |          |          | 47.0     | 6.5       |
| <b>9</b> |          |          |          |          |          |          |          |          | 24.5      |

<sup>[a]</sup> Coupling constants were determined by a five-step process:

1. Inspection of the <sup>19</sup>F {<sup>1</sup>H dec} NMR spectrum (Figure S19) provided all <sup>3</sup>J<sub>FF</sub>, <sup>4</sup>J<sub>FF</sub> and <sup>5</sup>J<sub>FF</sub> values, which allowed all fluorine signals (**3**, **5**, **7** and **9**) to be assigned;
2. The <sup>19</sup>F NMR spectrum (Figure S18) was then simulated, giving all <sup>3</sup>J<sub>HF</sub> values;
3. Inspection of the <sup>1</sup>H,<sup>1</sup>H 2D-COSY NMR spectrum (Figure S17) allowed signals corresponding to the “outside CHF protons” (**2** and **8**, δ ~ 4.4 ppm) to be distinguished from the “inside CHF protons” (**4** and **6**, δ ~ 4.1 ppm);
4. Inspection of the “inside CHF protons” region of the <sup>1</sup>H NMR spectrum (Figure S16) revealed that one multiplet (δ 4.19 ppm) contained a coupling constant of 9.1 Hz, while the other (δ 4.24 ppm) contained a coupling constant of 16.7 Hz; these values were cross-checked against the <sup>3</sup>J<sub>HF</sub> values from the simulated <sup>19</sup>F NMR spectrum (Figure S18), which allowed protons **4** and **6** to be unambiguously assigned to their respective signals;
5. Further inspection of the multiplets corresponding to protons **4** and **6** in the <sup>1</sup>H NMR spectrum (Figure S16) revealed the <sup>3</sup>J<sub>HH</sub> values between protons (**2** and **4**), (**4** and **6**), and (**6** and **8**).

This five-step process provided a complete “map” of <sup>3</sup>J<sub>HF</sub> and <sup>3</sup>J<sub>HH</sub> values. It should be emphasised that there remains an ambiguity because this “map” of *J* values suggests a symmetrical pattern of *gauche* and *anti* H-C-C-F and H-C-C-H angles, and the “map” of *J* values could fit the molecule in either of two orientations (see structures above). Nevertheless, both orientations of the “map” of *J* values suggest the same molecular conformation.



Figure S21. Variable-temperature  $^1\text{H}$  NMR (500 MHz, 81:19 v/v  $\text{CDCl}_3/\text{D}_8\text{-THF}$ ) of **1c**

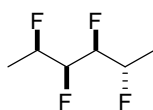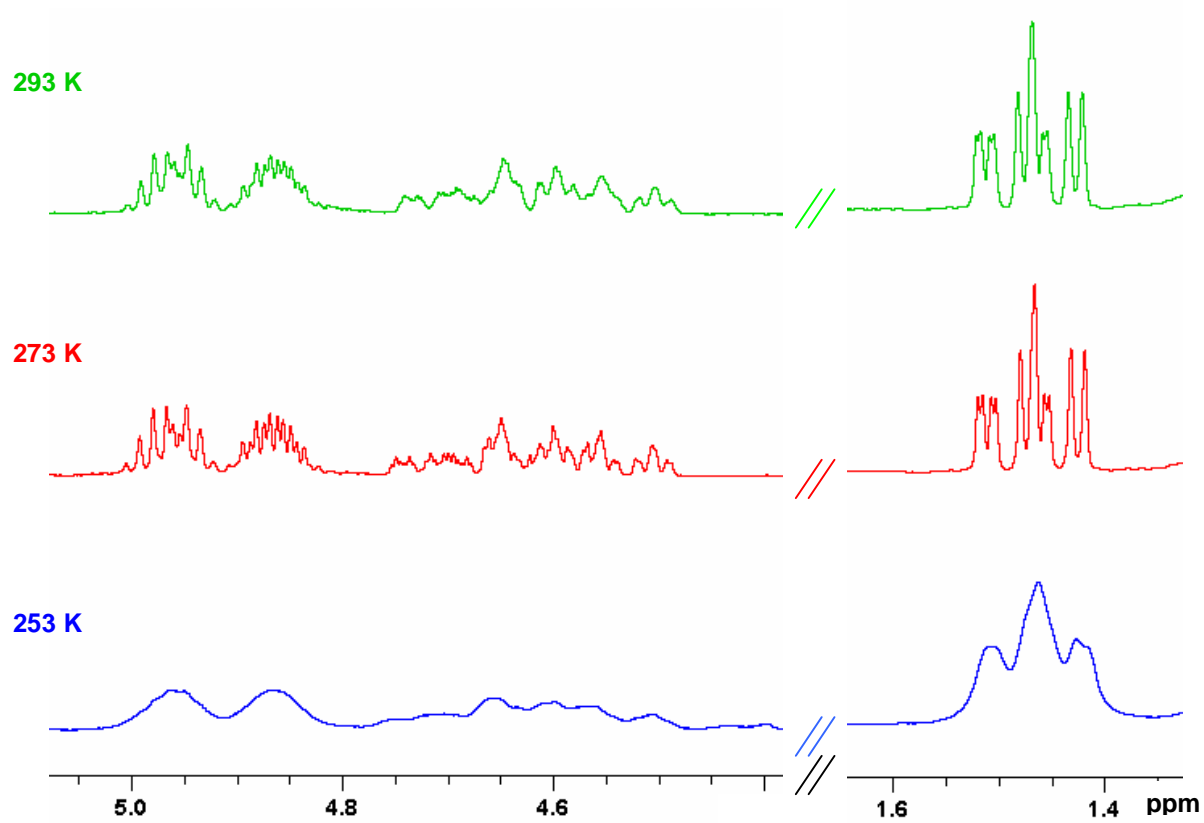

Figure S22. Variable-temperature  $^{19}\text{F}$  NMR (470 MHz, 81:19 v/v  $\text{CDCl}_3/\text{D}_8\text{-THF}$ ) of **1c**

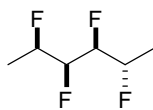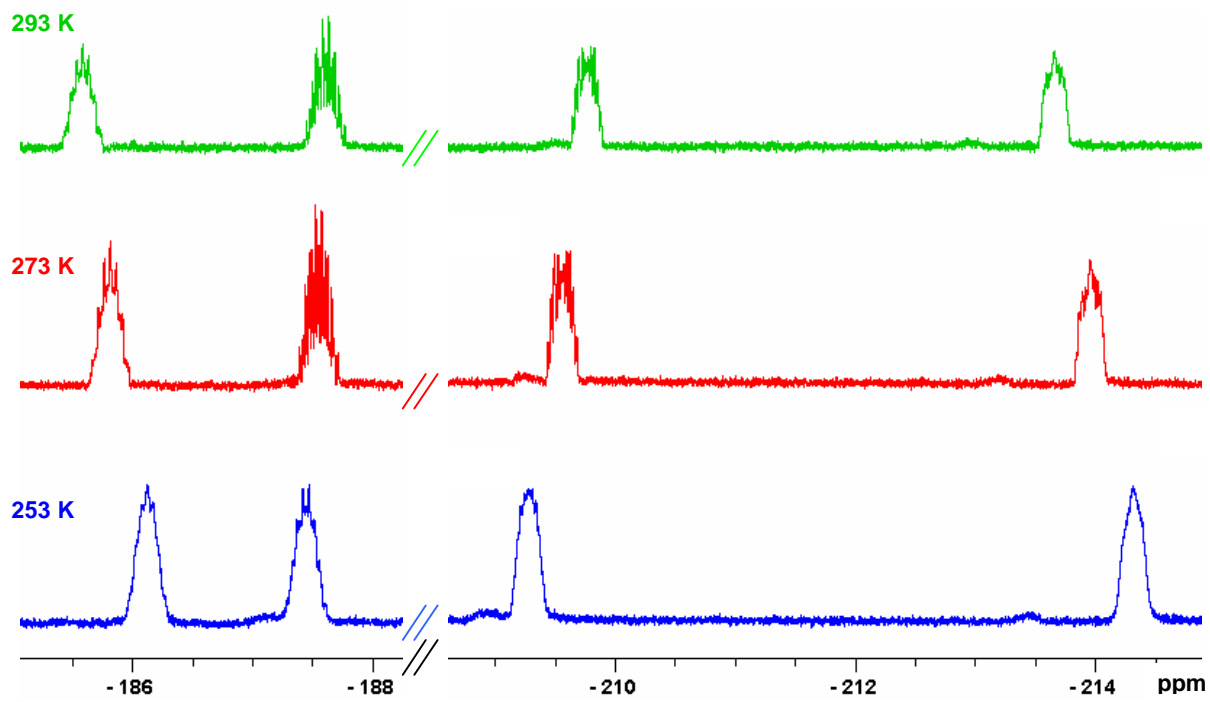

Figure S23. Variable-temperature  $^{19}\text{F}$   $\{^1\text{H dec}\}$  NMR (470 MHz, 81:19 v/v  $\text{CDCl}_3/\text{D}_8\text{-THF}$ ) of **1c**

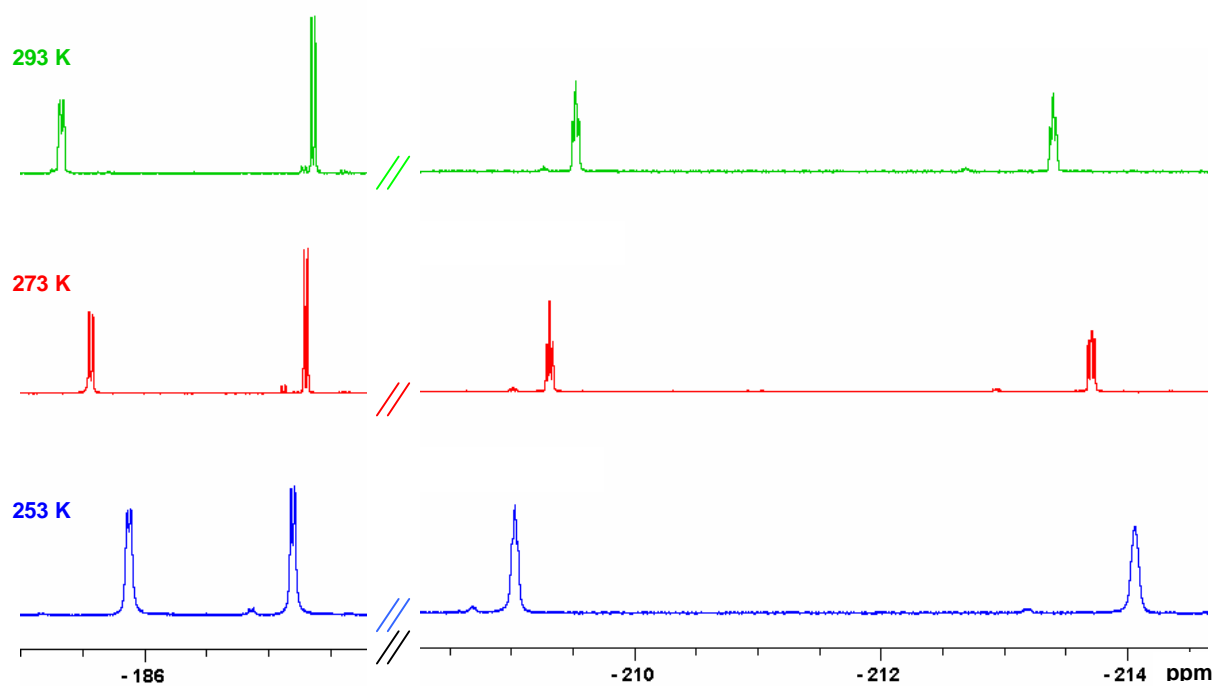

Figure S24. GC-MS (CI, +ve) spectrum of **1a**:

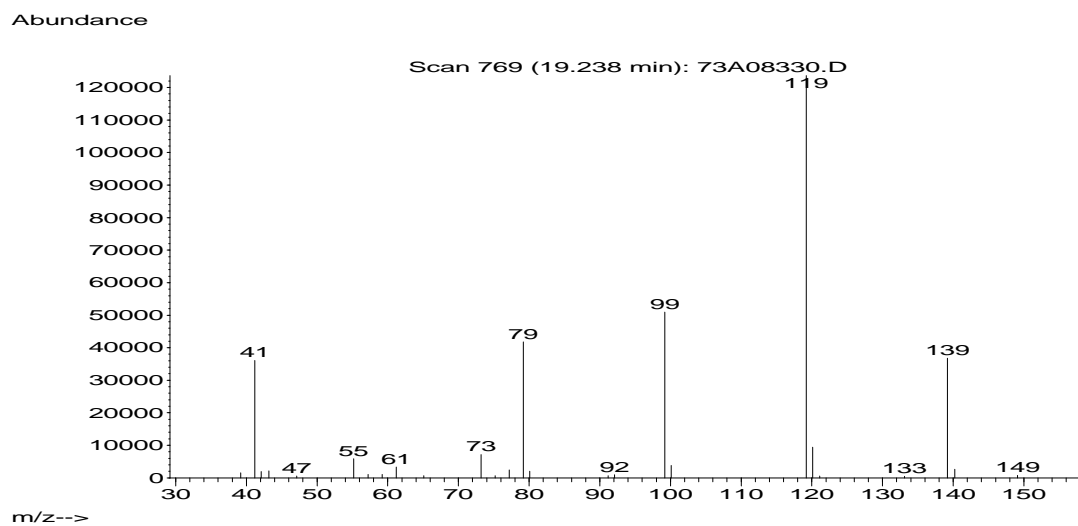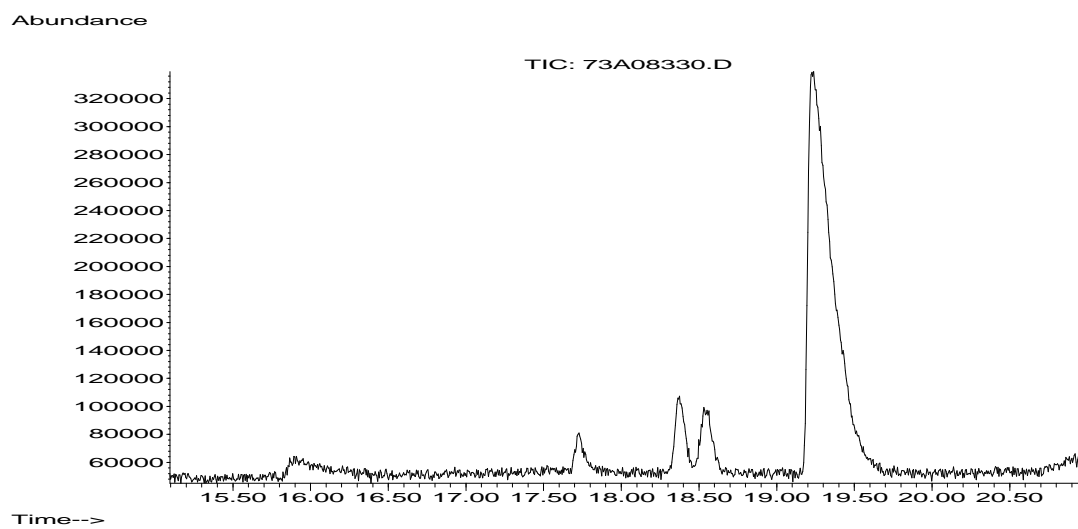

Figure S25. GC-MS (CI, +ve) spectrum of **1b**:

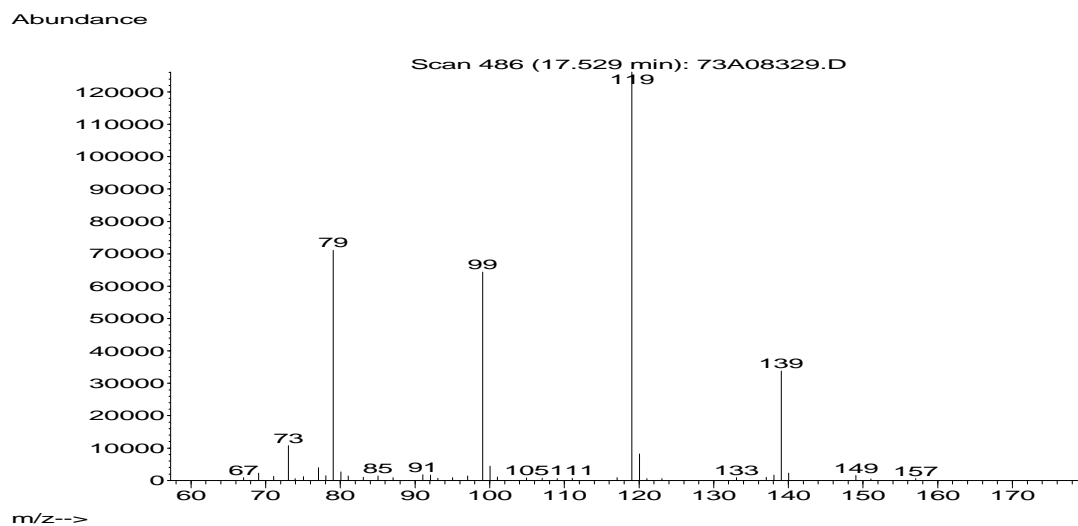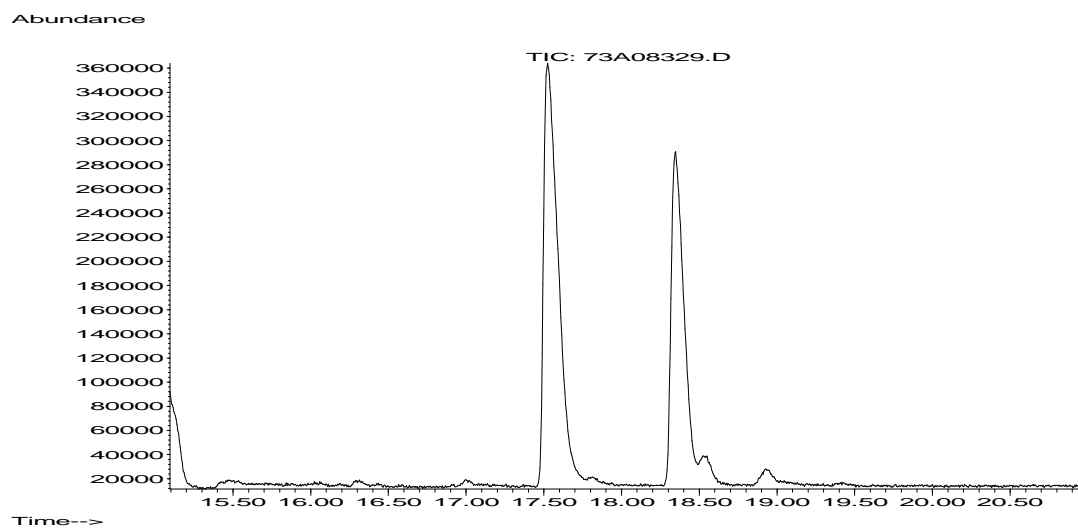

Figure S26. GC-MS (CI, +ve) spectrum of **1c**

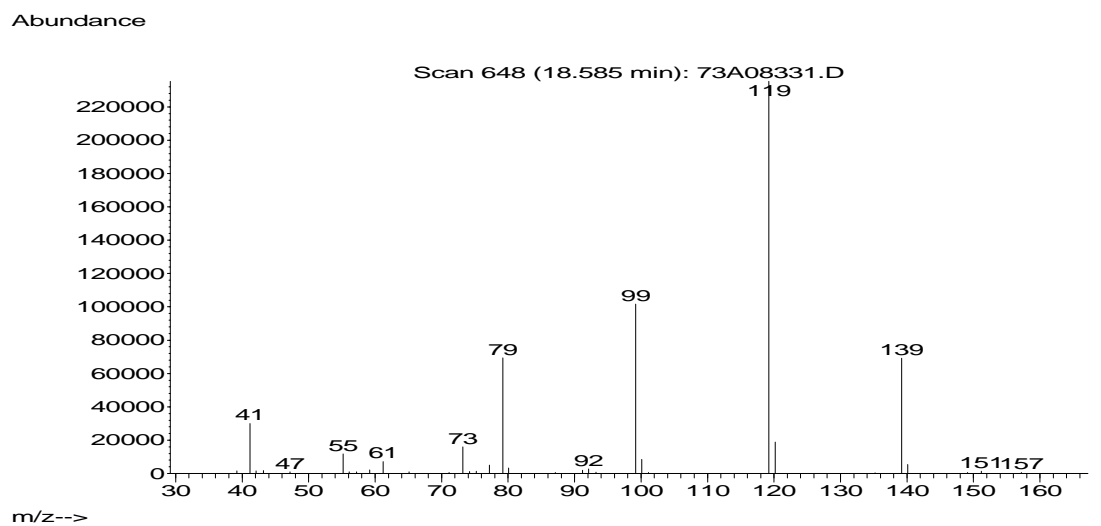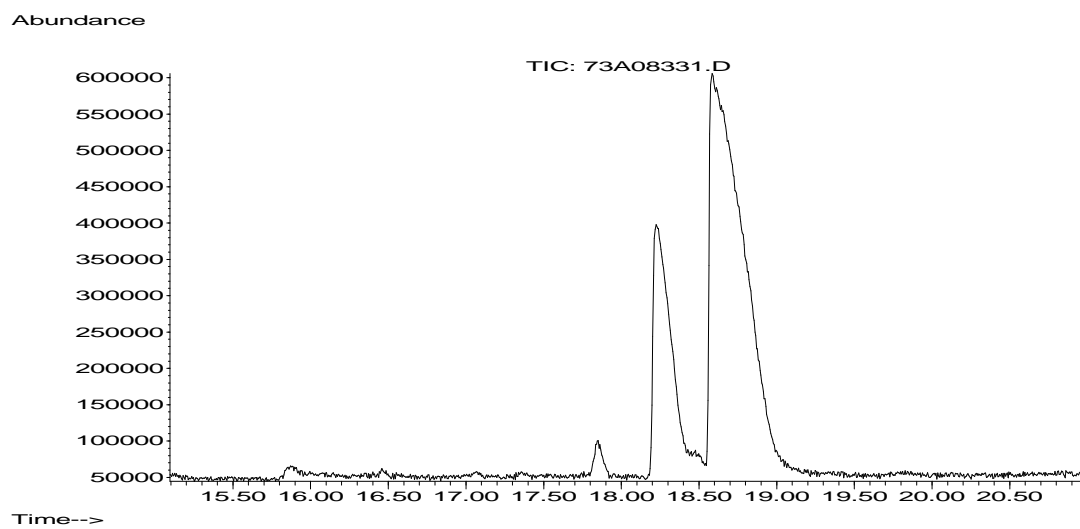

Table S4. Computational details for minimum-energy conformers of **1a–c**.

| Compound                                 | <b>1a</b>                                                                         | <b>1b</b>                                                                          | <b>1c</b>                                                                           |
|------------------------------------------|-----------------------------------------------------------------------------------|------------------------------------------------------------------------------------|-------------------------------------------------------------------------------------|
| Minimum-energy conformation <sup>1</sup> | 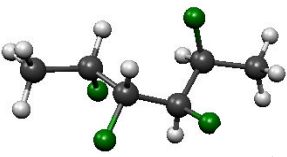 |  |  |
| <b>Geometry</b>                          | B3LYP/6–31G(d)                                                                    | B3LYP/6–31G(d)                                                                     | B3LYP/6–31G(d)                                                                      |
| E (a.u.)                                 | –634.01335330                                                                     | –634.01433900                                                                      | –634.01169980                                                                       |
| E (kcal/mol)                             | –397843.37919575                                                                  | –397843.99772250                                                                   | –397842.34162450                                                                    |
| ZPE (kcal/mol)                           | 100.30415000                                                                      | 100.00460000                                                                       | 100.17691000                                                                        |
| E + ZPE (kcal/mol)                       | –397743.07504575                                                                  | –397743.99312250                                                                   | –397742.16471450                                                                    |
| <b>Single point</b>                      | B3LYP/6–311+G(2d,p)                                                               | B3LYP/6–311+G(2d,p)                                                                | B3LYP/6–311+G(2d,p)                                                                 |
| E (a.u.)                                 | –634.24446510                                                                     | –634.24575530                                                                      | –634.24347620                                                                       |
| E (kcal/mol)                             | –397988.40185025                                                                  | –397989.21145075                                                                   | –397987.78131550                                                                    |
| E + ZPE (kcal/mol)                       | –397888.09770025                                                                  | –397889.20685075                                                                   | –397887.60440550                                                                    |
| <b>ΔE (kcal/mol)</b>                     | <b>–5.86</b>                                                                      | <b>0.00</b>                                                                        | <b>–1.66</b>                                                                        |
| <b>Single point</b>                      | MP2/6–311+G(2d,p)                                                                 | MP2/6–311+G(2d,p)                                                                  | MP2/6–311+G(2d,p)                                                                   |
| E (a.u.)                                 | –632.81184240                                                                     | –632.81202890                                                                      | –632.81039440                                                                       |
| E (kcal/mol)                             | –397089.43110600                                                                  | –397089.54813475                                                                   | –397088.52248600                                                                    |
| E + ZPE (kcal/mol)                       | –396989.12695600                                                                  | –396989.54353475                                                                   | –396988.34557600                                                                    |
| <b>ΔE (kcal/mol)</b>                     | <b>–6.50</b>                                                                      | <b>0.00</b>                                                                        | <b>–2.16</b>                                                                        |
| <b>Dipole (D)</b>                        | <b>2.19</b>                                                                       | <b>0.25</b>                                                                        | <b>3.54</b>                                                                         |
| <b>Surface area (Å<sup>2</sup>)</b>      | <b>187.406</b>                                                                    | <b>190.691</b>                                                                     | <b>190.285</b>                                                                      |
| <b>Volume (Å<sup>3</sup>)</b>            | <b>165.497</b>                                                                    | <b>166.306</b>                                                                     | <b>166.226</b>                                                                      |

Figure S27. Molecular dipole moment for alternative conformer of **1c** [B3LYP/6-311+G(d,p)]

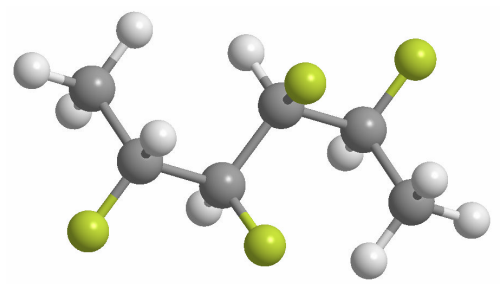

Dipole = 1.4199 D
